A - a a a a -a a  
a a a a a a - - a COVID-19. T  
P -A C V F a T a .

F a A. Ca a <sup>1,2</sup>, A G <sup>3</sup>, Ca G. Wa <sup>4</sup>, J M C <sup>3</sup>

<sup>1</sup> A a a H U , D E a M a ,  
D a M , E a Pa a M a, U a F a S  
Pa (EPM/UNIFESP), S Pa , SP, B a

<sup>2</sup> C a I , B a a, DF, B a

<sup>3</sup> A B I , I , CA, USA

<sup>4</sup> B U , RI, USA

A :  
F a A. Ca a , MD, MS , P D  
D E a M a , D a M ,  
E a Pa a M a, U a F a S Pa  
R a P T 781 13 , 04039-032 S Pa , SP B a  
E a : [a . a a @ .](mailto:a.a.a@.) ; [. a a @ a .](mailto:.a.a@.)  
T : +55 61 996506111, Fa : +55 61 33464733

K - : COVID-19, SARS-C V-2, a a , a , a ,

A a

Ba : W COVID-19 a a a a a ,  
a a a a a a , a a a  
a a a a a a a a a COVID-19. A  
a a a a a , a (HA) ,  
a (PCOS), a , a a a a a  
(CAH) a a a a (AGA), a HA a a  
a a a . T a a a  
a a a a a a a a a COVID-19

a , a a HA a a a

a a .

Ma a a : F a a a

COVID-19 a - a a a ( PCR-SARS-C V-2)

a a a -HA, HA, a HA a (HA- )

. Pa a a a , 23 a , 44

a a a , 28 , a a a

a COVID-19 a a . T a a ,

a 500 / a a a a , a a

400 / a a , a a 500 a a a ,

0.2 / / a a , a a a 100 a a .

Pa a COVID-19 a , a a a a , a

a .

R : I a , 270 a , 195, 67, a -HA, HA,

a HA- , . P a a a (71.1%), a a

(67.0%), a a (48.1%), a a (37.4%), (36.3%), a a

a (34.1%), a (33.3%), a (29.5%), a (27.8%), a a

(24.8%), a a (24.1%) a (21.5%). Ea ( a )

(1.0 ± 0.2 day), abdominal pain (1.1 ± 0.3); a a (1.1 ± 0.5),

a a a (1.2 ± 0.5), a a (1.2 ± 0.5), dry cough (1.2 ± 0.5),

a a (1.2 ± 0.4), a a (1.3 ± 0.5) a a (1.3 ± 0.5). T - - a ,

PCR, a a a a a a a a

a HA- a -HA, HA, a a - . T - - a

a a a a a PCR-SARS-C V-2

a -HA a HA. S a

a a a - COVID-19. F -HA a HA a

a a a a a , a , a a a. A a ,

a a a a a -HA a HA. N a

a a a COVID-19 a .

C : A , a COVID-19 a a a a

a a a a a

-, a -, a (BMI)-, a a - a - a

a , a a a - a a a

a a COVID-19 a . HA a  
a a a , a  
. S a a a HA.

## Background

COVID-19 a - a - a a S  
A R a S C a 2 (SARS-C V-2). I a a  
a a a a , a a a a ,  
a a a (1-4).

O a a a a  
a a a a a a a , a  
COVID-19 a , a a a  
a a a a , a a a a a  
a a a a .

W a a a a a a  
a a a a , a a a a a a  
a a COVID-19, a a  
a a a , . . , COVID-19 a a  
. M a . a a a a  
a a a a a , a  
(5).

B a a - a , a a ,  
a a a , a a a a ,  
a a a , a .

Y a a a a  
, a a a , a a a a

( a a a a a a a a a a ),  
a a , a a  
a a a COVID-19  
a a a a a (6-9).

A a a a  
*sine-quo-non* a a a -  
P a C a R a ( PCR) SARS-C V-2 (10,11). W  
a COVID-19,  
COVID-19 a , a a COVID-19 a a  
a a a . T a a a  
a a COVID-19 a a a a  
a COVID-19, *per se* a a a a  
COVID-19 a a . R a a COVID-  
19 a a a a 10%  
a (12-14).

S a a *in vitro* a a a a SARS-  
C V-2 a a a a COVID-19 (13), a  
a a a a a ,  
a a , a a (13,14). H ,  
COVID-19 a a a a  
, a a a a , a a  
a a a . A , a a a  
(RCT) a a COVID-19 , a a a  
a a (10-14).

W a a a a a a a a  
COVID-19 a a ,  
a a a a a a . T a a a  
a a a , a COVID-19 a a  
a a a , a a a a .

A , a , a a  
a COVID-19 a a a , a a ,  
a / a (15-23). O a a  
a a COVID-19 a a ,  
a (BMI), a , *i.e.*, a a  
a (15-18). T a , a a a , a a  
a 2 (TMPRSS-2), a a SARS-C V-2 , a  
a a a a a . A a , a a a  
(AGA) a a a a COVID-19,  
a a a (AR), a  
(DHT) , a , a a  
a , a AGA a a a .

W a a a COVID-19 a ,  
a a , a , a 2 a (T2DM),  
a a COVID-19 a  
a a . I a , a a a a a AGA a , a  
a a (HA), a  
(PCOS), a , a a a a (CAH) 21a a-  
a 11 a- a , a AGA, a HA, a  
a a a a a a  
a a -HA a .

I a , a a a a , a  
a a a a a , a a a (19-22). T  
a a a a a a a  
COVID-19. N , a a a a ,  
a a a , a a a .

T a , a a , a a a  
a a a a a  
COVID-19 a a a a , a  
a , a a a a a

.A , a a a ,  
.

T , a a , a a  
a , a a a  
a a a .

T a a a  
a a a a COVID-19 a  
a - a , a a a a  
a . I a , a - a a a 0 a a  
- a a a

A a , A , USA; C a SARS-C V-2, R , S a ), a SARS-C V-2 .

I a : 1. C COVID-19 PCR-SARS-C V-2; 2. 18 a a a ; 3. L a a ; 4. L a 72 COVID-19 a ( a COVID-19 a a a ); 4. N a 24 a a a ; a 5. N a a .

### *Design and methods*

Pa a a a a Ta 1. F a a a a , 23 a , 44 a a a , 28 , a a HA, : 1. PCOS R a C a; 2. P a CAH; 3. K a , a - a ; 4. H ; a 5. F a AGA. F a a HA ( -HA ), a a a , a 100 / a a (HA-S ) (HA ).

C a a 1. A a- A a a ; 2. D - a / a a ; 3. U a a (URTI) URTI- a / a a ; 4. Ga a (GI) - a / a a ; 5. M ; 6. U a ; 7. A a .

T a a , a : 1. A a-A a a : a a a a , , - , - a ; 2. D - a a : a a a a, a a a , a a - a a ; 3. URTI- a a : a a a a , , - , - a ;

4. GI - a a : a a a a, a a , ,  
a a a ;

5. M : a a a

6. U a : a

a a ;

7. A a .

A a a a , a a 500 / a  
a , 400 / a a , a a 500  
a a a , 0.2 / / a a a . T  
, a a , a / a a a  
a - a a , . . , a , a  
. I a , a , a D, a C, , a a a ,  
a a a , a a , a a , a a  
a .

Pa a a : 1. T - -a a a a a  
( a ); 2. T ,  
a a a a ( a ); 3. T ,  
a a a a ( a ); 4. D a PCR-SARS-  
C V-2 ( a , PCR a a ); 5. L  
a Da -7 -4, -3 -1, 0, 1, 2, 3, 7, 14, 21, 30 a 60 a ,  
0 a ( a a  
) a 100 a a a ; 6. A  
a a Da 0, 3, 7, 14 a 30 (0 = a a a 100 =  
a a - a a a ); 7. WHO COVID O a  
O S a ; 8. B a COVID-19 ; 9. D a ,  
a a , a a a , a a . F a a a a a a a a  
( :// . / 4 8/).

### Statistical analysis



ANOVA (Kruskal-Wallis) test was used to compare the baseline characteristics of the two groups. A *post-hoc* analysis was performed using the Dunn-Sidak test, with  $p < 0.05$ . All analyses were performed using XLSTAT (Mouscron, Belgium), (USA).

| Aspect                       | Parameter                                                                                                                                                                                                                                                                                                    |
|------------------------------|--------------------------------------------------------------------------------------------------------------------------------------------------------------------------------------------------------------------------------------------------------------------------------------------------------------|
| Baseline characteristics     | <p>! "#\$%&amp;'()*! +,-./:;&lt;=&gt;?@A B C D E F G H I J K L M N O P Q R S T U V W X Y Z [ \ ] ^ _ ` {   } ~ ¡ ¢ £ ¤ ¥ ¦ § ¨ © ª « ¬ ® ¯ ° ± ² ³ ´ µ ¶ · ¸ ¹ º » ¼ ½ ¾ ¿ À Á Â Ã Ä Å Æ Ç È É Ê Ë Ì Í Î Ï Ñ Ò Ó Ô Õ Ö × Ø Ù Ú Û Ü Ý Þ ß à á â ã ä å æ ç è é ê ë ì í î ï ð ñ ò ó ô õ ö ÷ ø ù ú û ü ý þ ÿ</p> |
| Disease and treatment timing | <p>! "#\$%&amp;'()*! +,-./:;&lt;=&gt;?@A B C D E F G H I J K L M N O P Q R S T U V W X Y Z [ \ ] ^ _ ` {   } ~ ¡ ¢ £ ¤ ¥ ¦ § ¨ © ª « ¬ ® ¯ ° ± ² ³ ´ µ ¶ · ¸ ¹ º » ¼ ½ ¾ ¿ À Á Â Ã Ä Å Æ Ç È É Ê Ë Ì Í Î Ï Ñ Ò Ó Ô Õ Ö × Ø Ù Ú Û Ü Ý Þ ß à á â ã ä å æ ç è é ê ë ì í î ï ð ñ ò ó ô õ ö ÷ ø ù ú û ü ý þ ÿ</p> |
| Medical history              | <p>! "#\$%&amp;'()*! +,-./:;&lt;=&gt;?@A B C D E F G H I J K L M N O P Q R S T U V W X Y Z [ \ ] ^ _ ` {   } ~ ¡ ¢ £ ¤ ¥ ¦ § ¨ © ª « ¬ ® ¯ ° ± ² ³ ´ µ ¶ · ¸ ¹ º » ¼ ½ ¾ ¿ À Á Â Ã Ä Å Æ Ç È É Ê Ë Ì Í Î Ï Ñ Ò Ó Ô Õ Ö × Ø Ù Ú Û Ü Ý Þ ß à á â ã ä å æ ç è é ê ë ì í î ï ð ñ ò ó ô õ ö ÷ ø ù ú û ü ý þ ÿ</p> |
| Current medications          | <p>! "#\$%&amp;'()*! +,-./:;&lt;=&gt;?@A B C D E F G H I J K L M N O P Q R S T U V W X Y Z [ \ ] ^ _ ` {   } ~ ¡ ¢ £ ¤ ¥ ¦ § ¨ © ª « ¬ ® ¯ ° ± ² ³ ´ µ ¶ · ¸ ¹ º » ¼ ½ ¾ ¿ À Á Â Ã Ä Å Æ Ç È É Ê Ë Ì Í Î Ï Ñ Ò Ó Ô Õ Ö × Ø Ù Ú Û Ü Ý Þ ß à á â ã ä å æ ç è é ê ë ì í î ï ð ñ ò ó ô õ ö ÷ ø ù ú û ü ý þ ÿ</p> |

|    |   |     |                                                                                                                                                                                                                                                                                                                                                                                                                                                                                                                                                                                                                                                                                                                                                                                                                                                        |
|----|---|-----|--------------------------------------------------------------------------------------------------------------------------------------------------------------------------------------------------------------------------------------------------------------------------------------------------------------------------------------------------------------------------------------------------------------------------------------------------------------------------------------------------------------------------------------------------------------------------------------------------------------------------------------------------------------------------------------------------------------------------------------------------------------------------------------------------------------------------------------------------------|
| Ca | a | a   | <p>1 \$-4&lt;&gt;:(B. \$5!!</p> <p>" 8#+(-\$87+8!B(8=\$5-\$5!+8, +&gt;+-(57!% " EP+)!%&lt;A5+:)!</p> <p>" 8#+(-\$87+8&lt;1!5\$B\$A-(5!&gt;:(B. \$57!% " F 1)!%&lt;-48)!</p> <p>J ((A!6+95\$-+B7!%@95(7\$ 0+6\$)!!</p> <p>; ,+4Q+6\$!6+95\$-+B7!%, &amp;65(B, :(5(+4Q+6\$!% / E ; R)!+864A4 0+6\$)! </p> <p>E4:B+9 0 !B, 488\$!:&gt;:(B. \$57!%EE 1)!%&lt;6+A+8\$)! </p> <p>M&lt;7A45+8#!6+95\$-+B7!%7A+5(8(:4B-(8\$)! </p> <p>G-4+87!%A+4=4&lt;5(79=4&lt;5!4-(5=4&lt;5!A54=4&lt;5!7+0=47-4+8)! </p> <p>L-, \$5!:+A+6&lt;:( ? \$5+8#!4#\$8-7!%@+&gt;54-\$7\$!\$Q\$+0+&gt;\$!DEGMT!</p> <p>+8, +&gt;+-(57)! </p> <p>" 7A+5+8!</p> <p>E:(A+6(#5\$:! </p> <p>* 45@45+8!</p> <p>U4!@4B-(5!+8, +&gt;+-(57!%4A+&gt;4048\$!5+=45(04&gt;48)! </p> <p>C+5\$B!-, 5( 0&gt;+8!+8, +&gt;+-(57!%64&gt;4#4-548)! </p> <p>/ \$A45+87!</p> <p>!</p>                      |
| D  | a | , a | <p>1 +#948+6\$7!% 0 \$-@ (50+8)! </p> <p>V:9B4#(8&lt;+:. \$!A\$A-+6\$!W!%V J DW)!5\$B\$A-(5!484:(#9\$7!%V J D&lt;</p> <p>WF4)!%:+54&lt;5!7\$ 0 4&lt;5!69:4#:9+6\$X!\$0\$84+6\$)! </p> <p>G(6+9 0 &lt;#:9B(7\$!B(&lt;-5487A(5-\$5!I!%GV J ; I)!+8, +&gt;+-(57!</p> <p>%GV J ; I)!%\$ 0 A4&lt;5!64A4&lt;5!B484#:+@:(Q+8)! </p> <p>C&lt;A\$A-&amp;:!A\$A-+647\$!Y!%CDDY)!+8, +&gt;+-(57!%CDDY+)!%=:64&lt;5!7+-4&lt;</p> <p>\$!7404&lt;5!:+84#:+A+8)! </p> <p>G9:@ (8&amp;:95\$47!%#:+A+Q+6\$S!#:+0 \$A+5+6\$S!#:+B4Q+6\$)! </p> <p>V:+4Q(8\$! </p> <p>" B45&gt;(7\$! </p> <p>3879:+8!</p> <p>L5:+7-4-!</p>                                                                                                                                                                                                                                                |
| H  | a | a   | <p>J\$=(-, &amp;5(0+8\$!% ? +-, !(5! ? +-, (9-!:+(-, &amp;5(8+8\$)! </p> <p>L54:!B(8-54B\$A-+=\$7! </p> <p>/ (5 0 (84:!5\$A:4B\$ 0 \$8-!-, \$54A&amp;!% / F ; )!@ (5! 0 \$8(A497\$! </p> <p>L-, \$5!, (5 0 (84:!5\$#+ 0 \$7! </p> <p>" 5( 0 4-47\$!+8, +&gt;+-(57!%4847-5(Q(:\$X!:\$-5(Q(:\$)! </p> <p>G\$:\$B-+=\$!\$7-5(#\$8!5\$B\$A-(5! 0 (69:4-(57!%GPF 2 7)! </p> <p>!!</p>                                                                                                                                                                                                                                                                                                                                                                                                                                                                       |
| C  | a | -a  | <p>/ &amp;A8(-+B7!%Q(:A+6\$ 0 \$!Q(A+B:(8\$S!\$7Q(A+B:(8\$S!54 0 \$:-\$(8)! </p> <p>G\$:\$B-+=\$!\$7\$(- (8+8!5\$9A-4. \$5!+8, +&gt;+-(57!%GGF37)!%@:9(0\$-+8\$S!</p> <p>%6\$7)=\$8:4@40+8\$S!\$7\$5-54:+8\$S!%\$7)B+-4:(A54 0 \$!=(5+ (0\$-+8\$S!</p> <p>@:9=(04 0+8\$)! </p> <p>L-, \$5!48+6\$A5\$7748-7!486!, 9 0 (5!7-4&gt;+:+Q\$57!%&gt;9A5(A+(8\$!</p> <p>-(A+54 0 4-\$S!-54Q(6(8\$S!4 0 +&lt;!(9!8(5-5+A-:+8\$S!-(A+54 0 4-\$S!</p> <p>(0B45&gt;4 0 4Q\$A+8\$)! </p> <p>1 \$8Q(6+4Q\$A+8\$7!%J(54&lt;5!&gt;5( 0 4&lt;5!6+4&lt;5!B:(84Q\$A4 0 X!4:A54&lt;5!</p> <p>0+64Q(:4 0)! </p> <p>" -&amp;A+B4:!48+7A7&amp;B, (-+B7!%(:48Q4A+8\$S!Z9\$-+4A+8\$S!5+7A5\$+6(8\$S!</p> <p>B:(Q4A+8\$S!45+A+54Q(:\$)! </p> <p>E\$8-54:!8\$5=(97!7&amp;7-\$ 0 !%E [ G)!7+0 9:48-7!% 0 \$-, &amp;:@\$8+64-\$S!</p> <p>:+76\$04 0 @-\$4 0+8\$S! 0 (64@+8+:)! </p> |
| O  |   |     | !                                                                                                                                                                                                                                                                                                                                                                                                                                                                                                                                                                                                                                                                                                                                                                                                                                                      |
| S  |   |     | <p>L 0 \$#4&lt;\!% ]!\#'64&amp;)! </p> <p>H+4 0+84!C!% ]!W\$^^^+9'64&amp;)! </p> <p>R+8B!% ]!W_ 0 # '64&amp;)! </p> <p>H+4 0+8!E!% ]!_ ^^ 0 # '64&amp;)! </p>                                                                                                                                                                                                                                                                                                                                                                                                                                                                                                                                                                                                                                                                                          |

|                                                          |                                                                                                                                                                                                                                                                                                                                                           |
|----------------------------------------------------------|-----------------------------------------------------------------------------------------------------------------------------------------------------------------------------------------------------------------------------------------------------------------------------------------------------------------------------------------------------------|
|                                                          | 2 9:-+=+4 0+87!                                                                                                                                                                                                                                                                                                                                           |
| <b>Vaccine</b>                                           | !                                                                                                                                                                                                                                                                                                                                                         |
|                                                          | 1 EV!%:+@ \$-+0 \$)!<br>38@:9\$8Q4!%+8! I^ I^)!<br>D8\$9 0 (B(BB4:!W\!(5! I\!%7+8B\$! I^W` )!                                                                                                                                                                                                                                                             |
| <b>Lifestyle</b>                                         | !                                                                                                                                                                                                                                                                                                                                                         |
|                                                          | E955\$8-!7 0 ( . +8#!% ]! I!A4B . 7' ? \$\$. !486! ]!W^!A4B . <&\$45)!<br>F\$#9:45!A , &7+B4:!4B-+=+&!% ]!W_ ^ 0+8' ? \$\$. \$! 0 (6\$54-\$<-( <<br>=+#(5(97\$! ]!\! 2 P ; 7\$!@ (5! ]!W& )!                                                                                                                                                              |
| <b>Clinical characterization</b>                         | P ( / )<br>T a a a ( a )<br>D a ( a )!                                                                                                                                                                                                                                                                                                                    |
| U                                                        | a\$=\$5!!<br>ba\$=\$5+7 , c!<br>/ \$464B , \$!<br>G , (5-8\$77! ( @!>5\$4- , !<br>" 8(7 0+4!<br>" # \$97+4! ! , &A\$5# \$97+4! ! 6&7# \$97+4!!<br>C+Q+8\$77!<br>* \$4 . 8\$77!<br>a4-+#9\$!<br>/ &A(5\$0+4! ! 48(5\$0+4!<br>; , (54B+B!A4+8!<br>J ( ? \$5!>4B . !A4+8!<br>C5&!\$&\$7! ! 65&! 0 (9- , !'7 . +8!:\$7+(87!!<br>1 5\$47-!A4+8!                |
| U a a                                                    | [ 474:!B(8#\$7+-(8!(5!5 , +8(55 , \$4!<br>C5&!B(9# , !<br>bG+897++7c!%7\$: @<5\$A(5-\$6!A\$5B\$A+-(8)!<br>bG(5\$!- , 5(4-c!%7\$: @<5\$A(5-\$6!A\$5B\$A+-(8)!                                                                                                                                                                                              |
| D -                                                      | 2 &4:#+4!<br>" 5- , 54:#+4!<br>d AA\$5!>4B . !A4+8!<br>E (8\98B-+=4: ! , &A\$5\$ 0 +4!<br>D5\$<(5>+4: !A4+8!                                                                                                                                                                                                                                              |
| Ga a (GI)                                                | C+455 , \$4!<br>[ 497\$47!<br>H( 0 +8#!<br>" >6( 0+84: ! (5!A\$: =+B!A4+8!                                                                                                                                                                                                                                                                                |
| C a                                                      | " 8(7 0+4< " # \$97+4! 6( 0+848B\$X! (5!<br>C\$8#9\$<: +. \$!7& 0 A-( 0 4- (: ( #&! ' !B: +8+B4: !A5\$7\$8-4+-(8X! (5!<br>d F ; 3<: +. \$!7& 0 A-( 0 4- (: ( #&! ' !B: +8+B4: !A5\$7\$8-4+-(8X! (5!<br>V3!+8@ \$B+-(8<: +. \$!7& 0 A-( 0 4- (: ( #&! ' !B: +8+B4: !A5\$7\$8-4+-(8X! (5!<br>2 +0\$6X! (5!<br>d 87A\$B+@+BX! (5!<br>" 7& 0 A-( 0 4+ B!<br>! |
| <b>Treatment</b>                                         | !                                                                                                                                                                                                                                                                                                                                                         |
| ( " Q+- , 5( 0 &B+8!_ ^^ 0 # '64&!@ (5!<br>^ _!64&7!K)!! | / &65(0&B , : (5(Z9+8\$!Y^^ 0 # '64&!@ (5!^ _!64&7\$! (5!<br>[ +4Q(048+6\$!_ ^^ 0 #! 1 3C!@ (5!^ e!64&7\$! (5!<br>3=\$5 0 \$B+8!^ f I 0 # ' . # '64&!@ (5!^ \!64&7!<br>K'<!!<br>GA+5(8(:4B-(8\$!W^^ 0 #! 1 3C!@ (5!W_!64&7\$! (5!!<br>C9-47-\$5+6\$!^ f _ 0 # '64&!98-+:!B95\$!                                                                           |

|                                                  |                  |   |                                                                                                                                                                                                                                                                                                                                                                                                                                                  |
|--------------------------------------------------|------------------|---|--------------------------------------------------------------------------------------------------------------------------------------------------------------------------------------------------------------------------------------------------------------------------------------------------------------------------------------------------------------------------------------------------------------------------------------------------|
| A<br>(a                                          | a<br>a<br>)      | a | U4!@4B-(5!+8,+>+-(57!<br>* 45@45+8!<br>P8(O4A45+8!<br>" B\$-&:74:+B&:+B!4B+6!% " G " )!<br>V:9B(B(5→B(+67!% 0 \$- ,&:A5\$68+7(: (8\$\$!6\$04 0 \$- ,47(8\$\$!<br>A5\$68+7(8\$\$!A5\$68+7(: (8\$)!<br>15( 0 , \$0+8\$!<br>[ <4B\$-&:B&7-\$+8\$!<br>E(:B , +B+8\$!<br>H+4 0 +8!E!%466++(84:!6(7\$\$!+@!4:5\$46&!986\$5!97\$)!<br>R+8B!%466++(84:!6(7\$\$!+@!4:5\$46&!986\$5!97\$)!<br>H+4 0 +8!C!%466++(84:!6(7\$\$!+@!4:5\$46&!986\$5!97\$)!<br>! |
| <b>Outcomes (Day 0 = beginning of treatment)</b> |                  |   | !                                                                                                                                                                                                                                                                                                                                                                                                                                                |
| WHO COVID O<br>O<br>(S a 1-5)                    | a                |   | C4&!^!<br>C4&!`!<br>C4&!WY!<br>C4&!\\^!<br>C4&!e^!                                                                                                                                                                                                                                                                                                                                                                                               |
| L<br>a<br>; 100 =<br>a )                         | a<br>(0-100; 0 = | a | C4&!^!<br>C4&!\\!<br>C4&!`!<br>C4&!WY!<br>C4&!\\^!                                                                                                                                                                                                                                                                                                                                                                                               |
| S<br>(0-100;0 =<br>; 100 =<br>)                  | a                |   | C4&!<^!-(!<Y!<br>C4&!<\\!-(!<W!<br>C4&!^!<br>C4&!W!<br>C4&!I!<br>C4&!\\!<br>C4&!`!<br>C4&!WY!<br>C4&!IW!<br>C4&!\\^!<br>C4&!e^!                                                                                                                                                                                                                                                                                                                  |
| T a CT a<br>(% a )                               |                  |   | C4&!^!<br>C4&!`!<br>C4&!WY!<br>C4&!\\^!<br>!                                                                                                                                                                                                                                                                                                                                                                                                     |
| <b>Disease progression outcomes</b>              |                  |   | !                                                                                                                                                                                                                                                                                                                                                                                                                                                |
|                                                  |                  |   | 1 5\$7B+4!ELH3C<WT!F\$7A+54-(5&!G\$=\$5+-&!GB4:\$!%^<Y)!<br>/ (7A+4:+Q4+(8!<br>38-\$87+=E45\$!d 8+!%3E d)!<br>2 \$B , 48+B4:!= \$8+:4+(8!<br>[ (5465\$84:+8\$'6(A4 0 +8\$!<br>C\$4- ,!                                                                                                                                                                                                                                                           |

Ta 6 15 a a a a a a a a a a  
( -HA, HA a HA- ), a a a a a . Ta 2 5  
a a a a a , Ta 6 8 COVID-19  
a , Ta 9 a 10 a a a  
COVID-19, a Ta 11 15 COVID-19 a .

Patients characteri ation

I a , 270 a COVID-19 . O , 195, 67,  
a -HA, HA, a HA- . T a a  
a a a a a a .  
Ba a a a Ta 2. HA a a  
, , a a a -HA.

!

| Ta 2. Ba a a .           |                           |                          |                     |                            |                                   |                   |
|--------------------------|---------------------------|--------------------------|---------------------|----------------------------|-----------------------------------|-------------------|
| Baseline characteristics | Overall females (n = 270) | Non-HA females (n = 195) | HA females (n = 67) | Spirolactone Users (n = 8) | Non-spiro (non-HA + HA) (n = 262) | p-value (overall) |
| Age (y/o)! )!            | 40.5 ± 11.5!              | 42.5 ± 11.6 )            | 35.2 ± 9.5 )        | 37.0 ± 7.1 )               | 40.6 ± 11.5 !                     | "!#\$###%!        |
| Height (m) )             | 1.63 ± 0.06!              |                          |                     |                            |                                   |                   |

Ta 3. C

| Comorbidities                                         | Overall females (n = 270) | Non-HA females (n = 195) | HA females (n = 67) | Spirolactone Users (n = 8) | Non-spiro (non-HA + HA) (n = 262) | p-value (overall) |
|-------------------------------------------------------|---------------------------|--------------------------|---------------------|----------------------------|-----------------------------------|-------------------|
| Hypertension!                                         | 38 (14.1%)!               | 24 (12.3%)               | 12 (17.9%)          | 2 (25.0%)                  | '&!+% '\$2 - .!                   | #&2!+/03.!        |
| Myocardial infarction                                 | 1 (0.4%)!                 | 1 (0.5%)!                |                     | 0                          | %!+#\$) - .!                      | #\$, ,!+/03.!     |
| Stroke                                                | 1 (0.4%)!                 | 1 (0.5%)                 |                     | 0                          | %!+#\$) - .!                      | #\$, ,!+/03.!     |
| Chronic Heart Failure (CHD)                           | 0!                        | 0                        |                     |                            | #!                                | /01!              |
| Lipid disorders                                       | 63 (23.3%)!               | 43 (22.1%)               | 17 (25.4%)          | 3 (37.5%)                  | &#!+( (\$, - .!                   | #\$4 (!+/03.!     |
| Type 2 diabetes mellitus ! (T2DM)                     | 20 (7.4%)!                | 10 (5.1%)                | 8 (11.9%)           | 0                          | %2!+&\$, - .!                     | #\$)2!+/03.!      |
| Pre-diabetes                                          | 21 (7.8%)!                | 11 (5.6%)                | 9 (13.4%)           | 2 (25.0%)                  | (#!+4\$& - .!                     | #&(!+/03.         |
| Dysglycemia ! (T2DM + pre-diabetes)!                  | 41 (15.3%)!               | 21 (10.8%)               | 17 (25.4%)          | 1 (12.5%)                  | '2!+%)\$* - .!                    | #\$4, !+/03.      |
| Obesity                                               | 52 (19.3%)!               | 32 (16.4%)               | 18 (26.8%)          | 2 (25.0%)                  | *#!+%, \$% - .!                   | #\$) (!+/03.      |
| Asthma                                                | 16 (5.9%)!                | 12 (6.2%)                | 4 (6.0%)            | 0                          | %&!+&\$% - .!                     | #\$, )!+/03.      |
| Major depression                                      | 15 (5.6%)!                | 11 (5.6%)                | 4 (6.0%)            | 0                          | %*!+*\$4 - .!                     | #\$, &!+/03.      |
| Anxiety-related disorders                             | 41 (15.2%)!               | 22 (11.3%)               | 16 (23.9%)          | 3 (37.5%)                  | '2!+%)\$* - .!                    | #\$\$4!+/03.      |
| Attention deficiency and hyperactive disorders (ADHD) | 14 (5.2%)!                | 18 (9.4%)                | 7 (10.4%)           | 1 (12.5%)                  | % ' !+*\$# - .!                   | #&'!+/03.         |
| Insomnia                                              | 15 (5.6%)!                | 8 (4.1%)                 | 6 (9.0%)            | 1 (12.5%)                  | %)!+*\$' - .!                     | #\$4, !+/03.      |
| Hypothyroidism                                        | 54 (20.0%)!               | 38 (19.5%)               | 14 (20.9%)          | 2 (25.0%)                  | *( !+%, \$2 - .!                  | #\$, &!+/03.      |
| Autoimmune disorders                                  | 10 (3.7%)                 | 9(4.6%)                  | 1 (1.5%)            | 0                          | %#!+' \$2 - .!                    | #\$ ' 2!+/03.!    |
| Menopause                                             | 65 (24.1%)!               | 56 (28.7%)*              | 8 (11.9%)           | 1 (12.5%)                  | &)!+( )\$) - .!                   | #\$\$#!+/03.      |
| Endometriosis                                         | 29 (10.4%)!               | 17 (8.7%)                | 11 (16.4%)          | 1 (12.5%)                  | (2!+*\$4 - .!                     | #&(!+/03.         |
| Breast cancer                                         | Y!%Wf_g)!                 | 3 (1.5%)                 | 1 (1.5%)            | 0                          | )!+*\$* - .!                      | #\$, ,!+/03.!     |

HA = a c; / = - ca ; /a = -a cab  
\* =0.04 HA a

Ta 4 a a a a a . M  
a a a a a HA a -HA  
a . N a , a a a , a a  
a . Wa a , a  
a a a . T a a a a

BCG, a a a a , a a a  
a a (Ta 5).

Ta 4. M a .

| Current medications                     | Overall females (n = 270) | Non-HA females (n = 195) | HA females (n = 67) | Spirolactone Users (n = 8) | Non-spiro (non-HA + HA) (n = 262) | p-value (overall) |
|-----------------------------------------|---------------------------|--------------------------|---------------------|----------------------------|-----------------------------------|-------------------|
| Beta-blocker                            | 3 (1.1%)                  | 3 (1.5%)                 | 0                   | 0                          | '!+%\$\$ - .!                     | 5!#\$, !+/03.!    |
| Angiotensin converter inhibitors (ACEi) | 8 (3.0%)                  | 5 (2.6%)                 | 2 (3.0%)            | 1 (12.5%)                  | 4!+(\$4 - .!                      | 5!#\$, !+/03.!    |
| Angiotensin-2 receptor blockers (ARB)   | 32 (11.8%)                | 19 (9.7%)                | 12 (17.9%)          | 1 (12.5%)                  | '%!+%\$\$2 - .!                   | #\$\$&%!+/03.!    |
| Loop diuretics                          | 3 (1.1%)                  | 2 (1.0%)                 | 0                   | 1 (12.5%)                  | (!+#\$2 - .!                      | /01!              |
| Thiazide diuretics                      | 10 (3.7%)                 | 8 (4.1%)                 | 2(3.0%)             | 0                          | %#!+'\$2 - .!                     | 5!#\$, !+/03.!    |
| Calcium channel blockers (CCB)          | 16 (5.9%)                 | 10 (5.1%)                | 6 (8.9%)            | 0                          | %&!+&\$% - .!                     | #\$2&!+/03.!      |
|                                         | !                         |                          |                     |                            | !                                 |                   |
| Statins!                                | 51 (18.9%)                | 33 (16.9%)               | 17 (25.4%)          | 1 (12.5%)                  | *#!+%,\$% - .!                    | #\$*&!+/03.       |
| Aspirin                                 | 1 (0.4%)                  | 1 (0.5%)                 |                     |                            | %!+#\$) - .!                      | /01               |

|                                                                                                        |            |            |            |           |                  |                 |
|--------------------------------------------------------------------------------------------------------|------------|------------|------------|-----------|------------------|-----------------|
| <b>Combined therapy (E+P) (for menopause)</b>                                                          | 29 (10.7%) | 24 (12.3%) | 5 (7.5%)   | 0         | (, !+%%\$% - .!  | #\$4 ' !+ /03.! |
| <b>Oral contraceptives</b>                                                                             | 36 (13.3%) | 17 (8.7%)* | 19 (28.4%) | 0         | ' &!+% '\$4 - .! | ##\$)*!         |
| <b>Other hormonal regimens</b>                                                                         | 0          | 0          | 0          | 0         | #!               | /01!            |
| <b>Aromatase inhibitors (anastrozole; letrozole) or Selective estrogen receptor modulators (SERMs)</b> | 3 (1.1%)   | 1 (0.5%)   | 2 (3.0%)   | 0         | ' !+%\$% - .!    | #\$2*!+ /03.!   |
| <b>Hypnotics</b>                                                                                       | 19 (7.0%)  | 10 (5.1%)  | 8 (11.9%)  | 1 (12.5%) | %2!+&\$, - .!    | #\$&2!+ /03.!   |
| <b>Selective serotonin reuptaker inhibitors (SSRIs)</b>                                                | 43 (15.9%) | 27 (13.8%) | 13 (19.4%) | 3 (37.5%) | )#!+%%*\$' - .!  | #\$44!+ /03.!   |
| <b>Other antidepressants and humor stabilizers</b>                                                     | 27 (10.0%) | 15 (7.7%)  | 11 (16.4%) | 1 (12.5%) | (&!+%##\$# - .!  | #\$*4!+ /03.!   |
| <b>Benzodiazepines</b>                                                                                 | 3 (1.1%)   | 2 (1.0%)   | 1 (1.4%)   | 0         | ' !+%\$% - .!    | #\$, , !+ /03.! |
| <b>Atypical antipsychotics</b>                                                                         | 7 (2.6%)   | 4 (2.0%)   | 3 (4.5%)   | 0         | 4!+(\$4 - .!     | #\$, %!+ /03.!  |
| <b>Central nervo</b>                                                                                   |            |            |            |           |                  |                 |



!!  
!!  
!!  
!!  
!!  
!!

;4>:\$!ef!E:+8B4:!B:97-\$5+8#!!

!!

d F; 3!i!dAA\$5!\$7A+54-(5&!-54B-!+8@ \$B-+(8X!V3!i!V47-5(+8-\$7-+84:X!HA = a c; / = -

ca

!

!

Ta 7 a a a , a a  
a , a - -a a a . P a a (71.1%) a  
a a (67.0%) a a a (48.1%). S 20% 40% COVID-19  
a a a (37.4%), (36.3%), (34.1%), a a  
a (34.1%), a (33.3%), a (29.5%), a  
(27.8%), a a (24.8%), a a (24.1%) a (21.5%). S

a 20% a a (15.9%), - a a (12.6%), a a a (10.4%), a a (8.1%), a a (8.1%), a a (7.8%), a a (7.7%), (6.7%), a (5.9%), a a (5.2%), a - a a (3.5%), (2.2%) a (1.1%).

COVID-19 a , a a : 1. Ea ( $< 2.0$  a ; a ): ( $1.0 \pm 0.2$ ), *abdominal pain* ( $1.1 \pm 0.3$ ); a a ( $1.1 \pm 0.5$ ), a a ( $1.2 \pm 0.5$ ), a a ( $1.2 \pm 0.5$ ), *dry cough* ( $1.2 \pm 0.5$ ), a a ( $1.2 \pm 0.4$ ), a a ( $1.3 \pm 0.5$ ), a ( $1.3 \pm 0.5$ ), ( $1.3 \pm 0.5$ ), a ( $1.3 \pm 0.5$ ), a ( $1.4 \pm 0.7$ ), - a a ( $1.4 \pm 0.6$ ), *sore throat* ( $1.4 \pm 0.7$ ), ( $1.5 \pm 0.6$ ), ( $1.5 \pm 0.6$ ), a a a ( $1.5 \pm 0.6$ ) and *diarrhea* ( $1.5 \pm 0.8$ ); a 2. La ( $> 2.0$  a ) *upper back pain* ( $2.0 \pm 0.8$ ); *lower back pain* ( $2.1 \pm 0.7$ ); a a ( $2.5 \pm 1.0$ ); a a ( $3.4 \pm 1.3$ ), a a ( $3.4 \pm 1.3$ ), a ( $3.8 \pm 1.2$ ).

D a COVID-19 a a a , ( $1.9 \pm 1.0$ ), a a a ( $1.8 \pm 0.7$ ), a a ( $1.7 \pm 0.9$ ), ( $2.3 \pm 0.8$ ); ( $2.4 \pm 1.2$ ), a ( $2.5 \pm 1.6$ ), a ( $2.7 \pm 1.4$ ) a - a a ( $2.8 \pm 1.3$ ); a a (3 5 a ), a a a ( $3.0 \pm 2.4$ ), a a ( $3.2 \pm 1.5$ ), a a ( $3.3 \pm 1.4$ ), a a ( $3.3 \pm 1.5$ ), a a a ( $3.6 \pm 1.8$ ), a a ( $4.3 \pm 2.1$ ), a a ( $4.7 \pm 2.5$ ), a ( $4.8 \pm 2.8$ ), a a a ( $4.9 \pm 2.6$ ); a a ( $> 5$  a ), ( $5.4 \pm 3.5$ ) a ( $5.5 \pm 1.9$ ), a a ( $5.7 \pm 3.5$ ), ( $6.0 \pm 2.6$ ), *dry eyes* ( $6.2 \pm 2.1$ ), a a ( $7.0 \pm 5.7$ ), *dry mouth* ( $7.0 \pm 0.0$ ), a ( $7.2 \pm 4.9$ ) and a a ( $7.9 \pm 6.2$ ).

S a - -a a a a : , , a a a, a a , a , , a , , a a , a a , a a , a a , - a a , a a . A a a a a HA a -HA a ( a ), a a a a .

A a a a a a a . F -HA  
a HA a a a a, a, , a , a a  
a. A a, a a a a -HA a HA.  
T - -a a a -HA a a .

! !  
; 4>: \$!` f!E: +8+ B4: ! 0 48+ @ \$7-4-+ ( 87!+8!ELH3C<WTj!A5\$7\$8B\$!% g )\$!-+ 0 \$<- (<4AA\$4548B\$!486!6954-+ ( 8f!!

| Clinical manifestations               | Overall females (n = 270) | Non-HA females (n = 195)                        | HA females (n = 67)    | Spirolactone Users (n = 8)      | Non-spiro (non-HA + HA) (n = 262) | p-value! (overall) |
|---------------------------------------|---------------------------|-------------------------------------------------|------------------------|---------------------------------|-----------------------------------|--------------------|
| <b>Fever</b>                          | !                         |                                                 |                        |                                 | !                                 | !                  |
| D5\$7\$8B\$!% g ) )!                  | !                         | (n/s (p=0.32) vs HA)<br>(n/s (p=0.64) vs spiro) | (n/s(p=0.41) vs spiro) | 0<br>(n/s(p=0.57) vs no-spiro)  | 31 (11.8%)                        | 0.52               |
| ; + 0 \$!-(! 4AA\$4548B\$!%64&7) )!   | ± !                       | ±<br>(n/s (p=0.19) vs HA)<br>(n/a vs spiro)     | ±<br>(n/a vs spiro)    | -<br>(n/a)                      | 1.5 ±                             | /a                 |
| C954-+(8!%64&7) )!                    | ± !                       | ±<br>(n/s (p=0.48) vs HA)<br>(n/a vs spiro)     | ±<br>(n/a vs spiro)    | -<br>(n/a)                      | ( \$(!± !                         | /01!               |
| <b>“Feverish”</b>                     | !                         |                                                 |                        |                                 | !                                 | !                  |
| D5\$7\$8B\$!% g ) )!                  | !                         | (n/s (p=0.12) vs HA)<br>(n/s (p=0.38) vs spiro) | (n/s(p=0.13) vs spiro) | 0<br>((n/s(p=0.26) vs no-spiro) | &%!+( '\$' - .!                   | #\$%&!             |
| ; + 0 \$!-(! 4AA\$4548B\$!%64&7) )!   | ± !                       | ±<br>(n/s (p=0.87) vs HA)<br>(n/a vs spiro)     | ±<br>(n/a vs spiro)    | 0<br>(n/a vs no-spiro)          | %\$)!± !                          | /01!               |
| C954-+(8!%64&7) )!                    | ± !                       | ±<br>(n/s (p=0.76) vs HA)<br>(n/a vs spiro)     | ±<br>(n/a vs spiro)    | 0<br>(n/a vs no-spiro)          | ( \$)!± !                         | /01!               |
| <b>Nasal congestion or rhinorrhea</b> | !                         |                                                 |                        |                                 | !                                 | !                  |
| D5\$7\$8B\$!% g ) )!                  | !                         | (n/s (p=0.33) vs HA)<br>(n/s (p=0.73) vs spiro) | (n/s(p=0.48) vs spiro) | ((n/s(p=0.65) vs no-spiro)      | , #!+ ' )\$* - .!                 | #\$*&!             |
| ; + 0 \$!-(! 4AA\$4548B\$!%64&7) )!   | ± !                       | ±<br>(n/s (p=0.69) vs HA)<br>(n/a vs spiro)     | ±<br>((n/a vs spiro)   | ±<br>(n/a vs no- spiro)         | ± !                               | /01!               |
| C954-+(8!%64&7) )!                    | ± !                       | ±<br>(n/s (p=0.72) vs HA)<br>(n/a vs spiro)     | ±<br>(n/a vs spiro)    | ±<br>(n/a vs no-spiro)          | ' \$&!± !                         | /01!               |
| <b>Headache</b>                       | !                         |                                                 |                        |                                 | !                                 | !                  |
| D5\$7\$8B\$!% g ) )!                  | !                         | (n/s (p=0.12) vs HA)<br>(n/s (p=0.33) vs spiro) | (n/s(p=0.13) vs spiro) | ((n/s(p=0.15) vs no-spiro)      | %( 2!+)2\$2 - .!                  | #\$%&!             |
| ; + 0 \$!-(! 4AA\$4548B\$!%64&7) )!   | ± !                       | ±<br>(n/s (p=0.10) vs HA)<br>(n/a vs spiro)     | ±<br>(n/a vs spiro)    | ±<br>(n/a vs no-spiro)          | %\$( !± !                         | /01!               |
| C954-+(8!%64&7)                       | ± !                       | ±                                               | ±                      | ±                               | *\$2!± !                          | /01!               |

|                             |     |                                                |                          |                            |                  |         |
|-----------------------------|-----|------------------------------------------------|--------------------------|----------------------------|------------------|---------|
|                             |     | (n/s (p=0.63) vs HA<br>(n/a vs spiro)          | (n/a vs spiro)           | (n/a vs no-spiro)          |                  |         |
| <b>Shortness of breath</b>  |     |                                                |                          |                            |                  |         |
| D5\$7\$8B\$!(g)             |     | (n/s (p=0.72) vs HA<br>(n/s (p=0.64) vs spiro) | (n/s(p=0.68) vs spiro)   | ((n/s(p=0.79) vs no-spiro) | %&!+&\$% - .!    | #\$2*!  |
| ;+0\$!-(4AA\$4548B\$!(64&7) | ± ! | ±<br>(n/s (p=0.28) vs HA<br>(n/a vs no-spiro)  | ±<br>(n/a vs spiro)      | (n/a vs no-spiro)          | '\$4 ± !!        | /01!    |
| C954+-(8!(64&7)             | ± ! | ±<br>(n/s (p=0.72) vs HA<br>(n/a vs spiro)     | ±<br>(n/a vs spiro)      | (n/a vs no-spiro)          | (\$* ± !         | /01!    |
| <b>Anosmia</b>              |     |                                                |                          |                            |                  |         |
| D5\$7\$8B\$!(g)             |     | (p = 0.025 vs HA<br>(p = 0.0008 vs spiro)      | (p = 0.0007 vs AGA-5ARi) | (p = 0.0036 vs no-5ARi)    | %,% !+4(\$, - .! | ####!   |
| ;+0\$!-(4AA\$4548B\$!(64&7) | ± ! | ±<br>(p=0.0009 vs HA<br>(n/a vs spiro)         | ±<br>(n/a vs spiro)      | (n/a vs no-spiro)          | '\$) ! ± !       | "!####! |
| C954+-(8!(64&7)             | ± ! | ±<br>(n/s(p=0.63) vs HA<br>(n/a vs spiro)      | ±<br>(n/a vs spiro)      | 3<br>(n/a vs no-spiro)     | 4\$, ! ± !       | "!####! |
| <b>Ageusia</b>              |     |                                                |                          |                            |                  |         |
| D5\$7\$8B\$!(g)             |     | (p=0.015 vs HA<br>(p=0.014 vs spiro)           | (p=0.001 vs spiro)       | (p=0.007 vs no-5ARi)       | %2#!+&,\$4 - .!  | ####' ! |
| ;+0\$!-(4AA\$4548B\$!(64&7) | ± ! | ±<br>(p=0.011 vs HA<br>(n/a vs spiro)          | ±<br>(n/a vs spiro)      | 1<br>(n/a vs no-spiro)     | '\$*! ± !        | /01!    |
| C954+-(8!(64&7)             | ± ! | ±<br>(p=0.045 vs HA<br>(n/a vs spiro)          | ±<br>(n/a vs spiro)      | (n/a vs no-spiro)          | 4\$%! ± !        | /01!    |
| <b>Dry cough</b>            |     |                                                |                          |                            |                  |         |

C954-+(8!%64&7)  
)!

± !

±  
(*p* = **0.037** vs *HA*)  
(*n/a* vs *spiro*)

±  
(*n/a* vs *spiro*)

(*n/a* vs *no-spiro*)

'\$' ± !

/01!

|  |  |  |  |  |  |  |  |  |  |
|--|--|--|--|--|--|--|--|--|--|
|  |  |  |  |  |  |  |  |  |  |
|  |  |  |  |  |  |  |  |  |  |
|  |  |  |  |  |  |  |  |  |  |
|  |  |  |  |  |  |  |  |  |  |
|  |  |  |  |  |  |  |  |  |  |
|  |  |  |  |  |  |  |  |  |  |
|  |  |  |  |  |  |  |  |  |  |
|  |  |  |  |  |  |  |  |  |  |
|  |  |  |  |  |  |  |  |  |  |
|  |  |  |  |  |  |  |  |  |  |
|  |  |  |  |  |  |  |  |  |  |
|  |  |  |  |  |  |  |  |  |  |
|  |  |  |  |  |  |  |  |  |  |
|  |  |  |  |  |  |  |  |  |  |
|  |  |  |  |  |  |  |  |  |  |
|  |  |  |  |  |  |  |  |  |  |
|  |  |  |  |  |  |  |  |  |  |
|  |  |  |  |  |  |  |  |  |  |
|  |  |  |  |  |  |  |  |  |  |
|  |  |  |  |  |  |  |  |  |  |
|  |  |  |  |  |  |  |  |  |  |
|  |  |  |  |  |  |  |  |  |  |
|  |  |  |  |  |  |  |  |  |  |
|  |  |  |  |  |  |  |  |  |  |
|  |  |  |  |  |  |  |  |  |  |
|  |  |  |  |  |  |  |  |  |  |
|  |  |  |  |  |  |  |  |  |  |
|  |  |  |  |  |  |  |  |  |  |
|  |  |  |  |  |  |  |  |  |  |
|  |  |  |  |  |  |  |  |  |  |
|  |  |  |  |  |  |  |  |  |  |
|  |  |  |  |  |  |  |  |  |  |
|  |  |  |  |  |  |  |  |  |  |
|  |  |  |  |  |  |  |  |  |  |
|  |  |  |  |  |  |  |  |  |  |
|  |  |  |  |  |  |  |  |  |  |
|  |  |  |  |  |  |  |  |  |  |
|  |  |  |  |  |  |  |  |  |  |
|  |  |  |  |  |  |  |  |  |  |
|  |  |  |  |  |  |  |  |  |  |
|  |  |  |  |  |  |  |  |  |  |
|  |  |  |  |  |  |  |  |  |  |
|  |  |  |  |  |  |  |  |  |  |
|  |  |  |  |  |  |  |  |  |  |
|  |  |  |  |  |  |  |  |  |  |
|  |  |  |  |  |  |  |  |  |  |
|  |  |  |  |  |  |  |  |  |  |
|  |  |  |  |  |  |  |  |  |  |
|  |  |  |  |  |  |  |  |  |  |
|  |  |  |  |  |  |  |  |  |  |
|  |  |  |  |  |  |  |  |  |  |
|  |  |  |  |  |  |  |  |  |  |
|  |  |  |  |  |  |  |  |  |  |
|  |  |  |  |  |  |  |  |  |  |
|  |  |  |  |  |  |  |  |  |  |
|  |  |  |  |  |  |  |  |  |  |
|  |  |  |  |  |  |  |  |  |  |
|  |  |  |  |  |  |  |  |  |  |
|  |  |  |  |  |  |  |  |  |  |
|  |  |  |  |  |  |  |  |  |  |
|  |  |  |  |  |  |  |  |  |  |
|  |  |  |  |  |  |  |  |  |  |
|  |  |  |  |  |  |  |  |  |  |
|  |  |  |  |  |  |  |  |  |  |
|  |  |  |  |  |  |  |  |  |  |
|  |  |  |  |  |  |  |  |  |  |
|  |  |  |  |  |  |  |  |  |  |
|  |  |  |  |  |  |  |  |  |  |
|  |  |  |  |  |  |  |  |  |  |
|  |  |  |  |  |  |  |  |  |  |
|  |  |  |  |  |  |  |  |  |  |
|  |  |  |  |  |  |  |  |  |  |
|  |  |  |  |  |  |  |  |  |  |
|  |  |  |  |  |  |  |  |  |  |
|  |  |  |  |  |  |  |  |  |  |
|  |  |  |  |  |  |  |  |  |  |
|  |  |  |  |  |  |  |  |  |  |
|  |  |  |  |  |  |  |  |  |  |
|  |  |  |  |  |  |  |  |  |  |
|  |  |  |  |  |  |  |  |  |  |
|  |  |  |  |  |  |  |  |  |  |
|  |  |  |  |  |  |  |  |  |  |
|  |  |  |  |  |  |  |  |  |  |
|  |  |  |  |  |  |  |  |  |  |
|  |  |  |  |  |  |  |  |  |  |
|  |  |  |  |  |  |  |  |  |  |
|  |  |  |  |  |  |  |  |  |  |
|  |  |  |  |  |  |  |  |  |  |
|  |  |  |  |  |  |  |  |  |  |
|  |  |  |  |  |  |  |  |  |  |
|  |  |  |  |  |  |  |  |  |  |
|  |  |  |  |  |  |  |  |  |  |
|  |  |  |  |  |  |  |  |  |  |
|  |  |  |  |  |  |  |  |  |  |
|  |  |  |  |  |  |  |  |  |  |
|  |  |  |  |  |  |  |  |  |  |
|  |  |  |  |  |  |  |  |  |  |
|  |  |  |  |  |  |  |  |  |  |
|  |  |  |  |  |  |  |  |  |  |
|  |  |  |  |  |  |  |  |  |  |
|  |  |  |  |  |  |  |  |  |  |
|  |  |  |  |  |  |  |  |  |  |
|  |  |  |  |  |  |  |  |  |  |
|  |  |  |  |  |  |  |  |  |  |
|  |  |  |  |  |  |  |  |  |  |
|  |  |  |  |  |  |  |  |  |  |
|  |  |  |  |  |  |  |  |  |  |
|  |  |  |  |  |  |  |  |  |  |
|  |  |  |  |  |  |  |  |  |  |
|  |  |  |  |  |  |  |  |  |  |
|  |  |  |  |  |  |  |  |  |  |
|  |  |  |  |  |  |  |  |  |  |
|  |  |  |  |  |  |  |  |  |  |
|  |  |  |  |  |  |  |  |  |  |
|  |  |  |  |  |  |  |  |  |  |
|  |  |  |  |  |  |  |  |  |  |
|  |  |  |  |  |  |  |  |  |  |
|  |  |  |  |  |  |  |  |  |  |
|  |  |  |  |  |  |  |  |  |  |
|  |  |  |  |  |  |  |  |  |  |
|  |  |  |  |  |  |  |  |  |  |
|  |  |  |  |  |  |  |  |  |  |
|  |  |  |  |  |  |  |  |  |  |
|  |  |  |  |  |  |  |  |  |  |
|  |  |  |  |  |  |  |  |  |  |
|  |  |  |  |  |  |  |  |  |  |
|  |  |  |  |  |  |  |  |  |  |
|  |  |  |  |  |  |  |  |  |  |
|  |  |  |  |  |  |  |  |  |  |
|  |  |  |  |  |  |  |  |  |  |

|                        |         |                                                                                                    |                                                  |                                                     |                     |                  |
|------------------------|---------|----------------------------------------------------------------------------------------------------|--------------------------------------------------|-----------------------------------------------------|---------------------|------------------|
| !                      |         |                                                                                                    |                                                  |                                                     |                     |                  |
| D5\$7\$8B\$!( g )      | !       | <i>I</i><br>( <i>n/a</i> vs <i>HA</i> )<br>( <i>n/a</i> vs <i>spiro</i> )                          | ( <i>n/a</i> vs <i>spiro</i> )                   | ( <i>n/a</i> vs <i>no-spiro</i> )                   | ( !+##2 - . !       | %%#!+ /03. !     |
|                        |         |                                                                                                    |                                                  |                                                     |                     |                  |
| ; +0\$!-( !            | $\pm$ ! | <i>I</i><br>( <i>n/a</i> vs <i>HA</i> )<br>( <i>n/a</i> vs <i>spiro</i> )                          | 3<br>( <i>n/a</i> vs <i>spiro</i> )              | ( <i>n/a</i> vs <i>no-spiro</i> )                   | +%6' . !            | /01!             |
| 4AA\$4548B\$!(64&7)    |         |                                                                                                    |                                                  |                                                     |                     |                  |
|                        |         |                                                                                                    |                                                  |                                                     |                     |                  |
| C954+-(8!(64&7)        | $\pm$ ! | ( <i>n/a</i> vs <i>HA</i> )<br>( <i>n/a</i> vs <i>spiro</i> )                                      | ( <i>n/a</i> vs <i>spiro</i> )                   | ( <i>n/a</i> vs <i>no-spiro</i> )                   | +%6' . !            | /01!             |
|                        |         |                                                                                                    |                                                  |                                                     |                     |                  |
| Abdominal pain         | !       |                                                                                                    |                                                  |                                                     | !                   | !                |
| !                      |         |                                                                                                    |                                                  |                                                     |                     |                  |
| D5\$7\$8B\$!( g )      | !       | ( <i>n/s</i> ( <i>p</i> =0.52) vs <i>HA</i> )<br>( <i>n/s</i> ( <i>p</i> =0.75) vs <i>spiro</i> )  | ( <i>n/s</i> ( <i>p</i> =0.58) vs <i>spiro</i> ) | ( <i>n/s</i> ( <i>p</i> =0.70) vs <i>no-spiro</i> ) | ( !+2\$# - . !      | ##\$4*!          |
|                        |         |                                                                                                    |                                                  |                                                     |                     |                  |
| ; +0\$!-( !            | $\pm$ ! | $\pm$<br>( <i>n/s</i> ( <i>p</i> =1.0) vs <i>HA</i> )<br>( <i>n/a</i> vs <i>spiro</i> )            | $\pm$<br>( <i>n/a</i> vs <i>spiro</i> )          | ( <i>n/a</i> vs <i>no-spiro</i> )                   | %%\$ $\pm$ !        | /01!             |
| 4AA\$4548B\$!(64&7)    |         |                                                                                                    |                                                  |                                                     |                     |                  |
|                        |         |                                                                                                    |                                                  |                                                     |                     |                  |
| C954+-(8!(64&7)        | $\pm$ ! | $\pm$<br>( <i>n/s</i> ( <i>p</i> =0.23) vs <i>HA</i> )<br>( <i>n/a</i> vs <i>spiro</i> )           | $\pm$<br>( <i>n/a</i> vs <i>spiro</i> )          | ( <i>n/a</i> vs <i>no-spiro</i> )                   | 2\$ $\pm$ !         | /01!             |
|                        |         |                                                                                                    |                                                  |                                                     |                     |                  |
| Conjunctival hyperemia | !       |                                                                                                    |                                                  |                                                     | !                   | !                |
| !                      |         |                                                                                                    |                                                  |                                                     |                     |                  |
| D5\$7\$8B\$!( g )      | !       | ( <i>n/s</i> ( <i>p</i> =0.071) vs <i>HA</i> )<br>( <i>n/s</i> ( <i>p</i> =0.82) vs <i>spiro</i> ) | ( <i>n/s</i> ( <i>p</i> =0.37) vs <i>spiro</i> ) | ( <i>n/s</i> ( <i>p</i> =0.69) vs <i>no-spiro</i> ) | (( !+2\$) - . !     | ##\$%2!          |
|                        |         |                                                                                                    |                                                  |                                                     |                     |                  |
| ; +0\$!-( !            | $\pm$ ! | $\pm$<br>( <i>n/s</i> ( <i>p</i> =0.88) vs <i>HA</i> )<br>( <i>n/a</i> vs <i>spiro</i> )           | $\pm$<br>( <i>n/a</i> vs <i>spiro</i> )          | ( <i>n/a</i> vs <i>no-spiro</i> )                   | %%\$ $\pm$ !        | /01!             |
| 4AA\$4548B\$!(64&7)    |         |                                                                                                    |                                                  |                                                     |                     |                  |
|                        |         |                                                                                                    |                                                  |                                                     |                     |                  |
| C954+-(8!(64&7)        | $\pm$ ! | $\pm$<br>( <i>n/s</i> ( <i>p</i> =0.54) vs <i>HA</i> )<br>( <i>n/a</i> vs <i>spiro</i> )           | $\pm$<br>( <i>n/a</i> vs <i>spiro</i> )          | ( <i>n/a</i> vs vs <i>no-spiro</i> )                | *\$# $\pm$ !        | /01!             |
|                        |         |                                                                                                    |                                                  |                                                     |                     |                  |
| Pre-orbital pain       | !       |                                                                                                    |                                                  |                                                     | !                   | !                |
| !                      |         |                                                                                                    |                                                  |                                                     |                     |                  |
| D5\$7\$8B\$!( g )      | !       | ( <i>n/s</i> ( <i>p</i> =0.57) vs <i>HA</i> )<br>( <i>n/s</i> ( <i>p</i> =0.57) vs <i>spiro</i> )  | ( <i>n/s</i> ( <i>p</i> =0.78) vs <i>spiro</i> ) | ( <i>n/s</i> ( <i>p</i> =0.53) vs <i>no-spiro</i> ) | ' ) !+%' '\$# - . ! | ##\$4#!+ /03. !  |
|                        |         |                                                                                                    |                                                  |                                                     |                     |                  |
| ; +0\$!-( !            | $\pm$ ! | $\pm$<br>( <i>n/s</i> ( <i>p</i> =0.27) vs <i>HA</i> )<br>( <i>n/a</i> vs <i>spiro</i> )           | $\pm$<br>( <i>n/a</i> vs <i>spiro</i> )          | ( <i>n/a</i> vs <i>no-spiro</i> )                   | %) $\pm$ !          | /01!             |
| 4AA\$4548B\$!(64&7)    |         |                                                                                                    |                                                  |                                                     |                     |                  |
|                        |         |                                                                                                    |                                                  |                                                     |                     |                  |
| C954+-(8!(64&7)        | $\pm$ ! | $\pm$<br>( <i>p</i> =0.016) vs <i>HA</i> )<br>( <i>n/a</i> vs <i>spiro</i> )                       | $\pm$<br>( <i>n/a</i> vs <i>spiro</i> )          | ( <i>n/a</i> vs <i>no-spiro</i> )                   | (2\$ $\pm$ !        | /01!             |
|                        |         |                                                                                                    |                                                  |                                                     |                     |                  |
| Dry eyes               | !       |                                                                                                    |                                                  |                                                     | !                   | !                |
| !                      |         |                                                                                                    |                                                  |                                                     |                     |                  |
| D5\$7\$8B\$!( g )      | !       | ( <i>n/s</i> ( <i>p</i> =0.99) vs <i>HA</i> )<br>( <i>n/s</i> vs <i>spiro</i> )                    | ( <i>n/s</i> vs <i>spiro</i> )                   | ( <i>n/s</i> vs <i>no-spiro</i> )                   | &!+(\$' - . !       | ##\$, 2!+ /03. ! |
|                        |         |                                                                                                    |                                                  |                                                     |                     |                  |
| ; +0\$!-( !            | $\pm$ ! | $\pm$<br>( <i>n/a</i> vs <i>HA</i> )<br>( <i>n/a</i> vs <i>spiro</i> )                             | ( <i>n/a</i> vs <i>spiro</i> )                   | ( <i>n/a</i> vs <i>no-spiro</i> )                   | %) $\pm$ !          | /01!             |
| 4AA\$4548B\$!(64&7)    |         |                                                                                                    |                                                  |                                                     |                     |                  |





## COVID-19 course and outcomes

Ta 10 a a - - a a a a a a

COVID-19 a a . T - - a , PCR, a a

a a a a a a a a HA-

a -HA, HA, a a - , HA- a

a a . C , - - a a a , a

a -HA a HA.

Ta 11 a a COVID-19. A a

a a HA , a a a a

a -HA a a . C ,

, a a HA a -

HA, a HA a HA- Da 2 7, a

a a a a . HA- a

a - a Da -3 -1 a Da 7, a a a HA a

Da -3 -1 a Da 2 7.

;4>:.\$!W^f!ELH3C<WT!B:+8+B4:!(9-B( 0\$7f

| Clinical clustering                     | Overall females (n = 270) | Non-HA females (n = 195)                                                                                                        | HA females (n = 67)                                                                                          | Spirolactone Users (n = 8)                                                                                                                   | Non-spiro (non-HA + HA) (n = 262) | p-value (overall)                                                          |
|-----------------------------------------|---------------------------|---------------------------------------------------------------------------------------------------------------------------------|--------------------------------------------------------------------------------------------------------------|----------------------------------------------------------------------------------------------------------------------------------------------|-----------------------------------|----------------------------------------------------------------------------|
| Time-to-treat!                          | $3.0 \pm 1.8$             | $3.0 \pm 1.9$<br>(n/s (p=0.11) vs HA)<br>(p<0.007 vs spiro)                                                                     | $3.4 \pm 1.4$<br>(p=0.0001 vs spiro)                                                                         | $0.5 \pm 1.1$ (Median = 0; 95%CI = 0.7)<br>(p=0.0003 vs no-spiro)<br>(p = 0.0028 vs no-spiro after adjustment for symptomatic patients only) | $3.1 \pm 1.8$                     | #####!                                                                     |
| Duration of positive rtPCR (days)!      | $13.9 \pm 6.1$            | $13.5 \pm 5.7$<br>(p=0.033 vs HA)<br>(p=0.025 vs spiro)                                                                         | $15.7 \pm 6.7$<br>(p=0.0005 vs spiro))                                                                       | $8.7 \pm 3.0$<br>(p=0.015 vs no-spiro)<br>(p = 0.015 vs no-spiro after adjustment for symptomatic patients only)                             | %)\$#!± 6.1!                      | ##\$*4!                                                                    |
| Remission not including anosmia (days)! | $5.8 \pm 4.7$             | $5.5 \pm 4.7$<br>(p=0.0003 vs HA)<br>(p=0.0008 vs spiro)<br>(p = 0.015 vs spiro after adjustment for symptomatic patients only) | $7.2 \pm 4.5$<br>(p<0.0001 vs spiro))<br>(p=0.0002 vs spiro after adjustment for only symptomatic patients)  | $1.4 \pm 1.4$ (Median = 1; 95%CI = 1.0)<br>(p=0.0003 vs no-spiro)<br>(p = 0.0046 vs no-spiro after adjustment for symptomatic patients only) | &\$#!± 4.7!                       | "!##\$###!<br>(p < 0.0001 after adjustment for only symptomatic patients)! |
| Remission including anosmia (days)!     | $9.6 \pm 7.3$             | $9.0 \pm 7.1$<br>(p=0.0001 vs HA)<br>(p=0.0004 vs spiro)<br>(p=0.0046 vs spiro after adjustment for symptomatic patients only)  | $12.4 \pm 7.0$<br>(p<0.0001 vs spiro))<br>(p<0.0001 vs spiro after adjustment for only symptomatic patients) | $1.7 \pm 2.0$ (Median = 1; 95%CI = 0.3)<br>(p=0.0001 vs no-spiro)<br>(p = 0.0013 vs no-spiro after adjustment for symptomatic patients only) | ,\$,!± 7.3!                       | "!##\$###!<br>(<0.0001 after adjustment for only symptomatic patients)!    |

HA = a c; / = - ca ; /a = -a cab

Ta 11. COVID-19 .

| Clinical evolution | Overall females (n = 270) | Non-HA females (n = 195)                            | HA females (n = 67)     | Spiro lactone Users (n = 8) | Non-spiro (non-HA + HA) (n = 262) | p-value (overall)   |
|--------------------|---------------------------|-----------------------------------------------------|-------------------------|-----------------------------|-----------------------------------|---------------------|
| Days -7 to -4!     | $\pm$                     | $\pm$                                               | $\pm$                   | $\pm$                       | 4, \$&! $\pm$                     | # \$ ' *!+ /03.!    |
| !                  | !                         | (n/s (p=0.41) vs HA)<br>(n/s (p=0.21) vs spiro)     | (n/s (p=0.34) vs spiro) | (n/s (p=0.23) vs no-spiro)  | !                                 |                     |
| Days -3 to -1!     | $\pm$                     | $\pm$                                               | $\pm$                   | $\pm$                       | ' (\$, ! $\pm$                    | # \$ # % )!         |
| !                  | !                         | (n/s (p=0.41) vs AGA vs HA)<br>(p=0.007 vs spiro)   | (p=0.003 vs spiro)      | (p=0.005 vs no-spiro)       | !                                 |                     |
| Day 0!             | $\pm$                     | $\pm$                                               | $\pm$                   | $\pm$                       | ' % \$ ( ! $\pm$                  | # \$ # 4 ( !+ /03.! |
| !                  | !                         | ((p=0.045) vs AGA vs HA)<br>(n/s (p=0.29) vs spiro) | (n/s (p=0.16) vs spiro) | (n/s (p=0.25) vs no-spiro)  | !                                 |                     |
| Day 1!             | $\pm$                     | $\pm$                                               | $\pm$                   | $\pm$                       | $\pm$                             | # \$ # # # 2!       |
| !                  | !                         | (p=0.0002 vs HA)<br>(n/s (p<0.30) vs spiro)         | (p=0.12) vs spiro (n/s) | (n/s (p=0.23) vs no-spiro)  | !                                 |                     |
| Day 2!             | $\pm$                     | $\pm$                                               | $\pm$                   | $\pm$                       | 4) \$ 2! $\pm$                    | " ! # \$ # # # %!   |
| !                  | !                         | (p<0.0001 vs HA)<br>(p=0.0051) vs spiro)            | (p=0.0007 vs spiro)     | (p=0.044 vs no-spiro)       | !                                 |                     |
| Day 3!             | $\pm$                     | $\pm$                                               | $\pm$                   | $\pm$                       | $\pm$                             | " ! # \$ # # # %!   |
| !                  | !                         | (p=0.0007 vs HA)<br>(p<0.0001 vs spiro)             | (p=0.0001 vs spiro)     | (p=0.0016 vs no-spiro)      | !                                 |                     |
| Day 7!             | $\pm$                     | $\pm$                                               | $\pm$                   | $\pm$                       | , ' \$ 2! $\pm$                   | # \$ # % 2!         |
| !                  | !                         | (p=0.023 vs HA)<br>(n/s (p=0.15) vs spiro)          | (p=0.023 vs spiro)      | (n/s (p=0.094) vs no-spiro) | !                                 |                     |
| Day 14!            | $\pm$                     | $\pm$                                               | $\pm$                   | $\pm$                       | , 2\$) ! $\pm$                    | # \$ & 4 !+ /03.!   |
| !                  | !                         | (n/s (p=0.45) vs HA)<br>(n/s (p=0.67) vs spiro)     | (n/s (p=0.49) vs spiro) | (n/s (p=0.62) vs no-spiro)  | !                                 |                     |
| Day 21!            | $\pm$                     | $\pm$                                               | $\pm$                   | $\pm$                       | , , \$) ! $\pm$                   | % \$ # !+ /03.!     |
| !                  | !                         | (n/s vs HA)<br>(n/s vs spiro)                       | (n/s vs spiro)          | (n/s vs no-spiro)           | !                                 |                     |
| Day 30!            | $\pm$                     | $\pm$                                               | $\pm$                   | $\pm$                       | , , \$ 2! $\pm$                   | % \$ # !+ /03.!     |
| !                  | !                         | (n/s vs HA)<br>(n/s vs spiro)                       | (n/s vs spiro)          | (n/s vs no-spiro)           | !                                 |                     |

| Day 60!                                       | $\pm$                     | $\pm$                                      | $\pm$                       | $\pm$                         | ###\$#! $\pm$                     | #\$#!+/03.!        |
|-----------------------------------------------|---------------------------|--------------------------------------------|-----------------------------|-------------------------------|-----------------------------------|--------------------|
|                                               |                           | (n/s vs HA)<br>(n/s vs spiro)              | (n/s vs spiro)              | (n/s vs no-spiro)             |                                   | !                  |
| HA = a c; / = - ca ; /a = -a cab ; CI = c c a |                           |                                            |                             |                               |                                   |                    |
| A Ta 12,                                      |                           |                                            | W H a O a a (WHO) COVID     |                               |                                   |                    |
| O a O                                         |                           |                                            | a , HA a a a                |                               |                                   |                    |
| a -HA a HA-                                   |                           |                                            | Da 0 a 7, a a a Da 14.      |                               |                                   |                    |
| N a a S 3 5                                   |                           |                                            | a .                         |                               |                                   |                    |
| T a a                                         |                           |                                            | a a Ta 13.N                 |                               |                                   |                    |
| a a a                                         |                           |                                            | a a . C , HA                |                               |                                   |                    |
| a                                             |                           |                                            | a -HA a HA- a               |                               |                                   |                    |
| ( = 0.004 a 0.028,                            |                           |                                            | a a a (Da 0).               |                               |                                   |                    |
| T a a                                         |                           |                                            | a (Da 3, 7, 14 a 30). E -HA |                               |                                   |                    |
| ( a a a ), Da 3 a a                           |                           |                                            | a Da 0.                     |                               |                                   |                    |
| ;4>:\$!WI. WHO COVID-19 O a O .               |                           |                                            |                             |                               |                                   |                    |
| WHO COVID Ordinal Outcomes                    | Overall females (n = 270) | Non-HA females (n = 195)                   | HA females (n = 67)         | Spiro nolactone Users (n = 8) | Non-spiro (non-HA + HA) (n = 262) | p-value! (overall) |
| Day 0 )!                                      | !                         | (p=0.028 vs HA)<br>(n/s((p=0.15) vs spiro) | (p=0.028 vs spiro)          | (n/s((p=0.098) vs no-spiro)   |                                   | 0.002 !            |
| G-4#\$!W                                      | !                         |                                            |                             |                               | 172 (65.6%)                       |                    |
| G-4#\$!I                                      | !                         |                                            |                             |                               | 90 (34.4%)                        |                    |
| G-4#\$7!\<_                                   | !                         |                                            |                             |                               | #!                                | !                  |
| Day 7 )!                                      | !                         | (p=0.021 vs HA)<br>(n/s vs spiro)          | (p=0.015 vs spiro)          | (n/s vs no-spiro)             |                                   | 0.021 !            |
| G-4#\$!W                                      | !                         |                                            |                             |                               | ( )4!+, )\$' - .!                 | !                  |
| G-4#\$!I                                      | !                         |                                            |                             |                               | %*!+*\$4 - .!                     | !                  |
| G-4#\$7!\<_                                   | !                         |                                            |                             |                               | #!                                | !                  |
| vs!C4&!^ %p-=4:9\$)!                          |                           |                                            |                             |                               | "!#\$####!                        | !                  |
| Day 14 )!                                     | !                         | (n/s vs HA)<br>(n/s vs spiro)              | (n/s vs spiro)              | (n/s vs no-spiro)             |                                   | 0.84 !             |
| G-4#\$!W                                      | !                         |                                            |                             |                               | (&#!+, ,\$( - .!                  | !                  |
| G-4#\$!I                                      | !                         |                                            |                             |                               | (!+#\$2 - .!                      | !                  |

|                                                   |                                  |                                                  |                            |                                     |                                          |                          |
|---------------------------------------------------|----------------------------------|--------------------------------------------------|----------------------------|-------------------------------------|------------------------------------------|--------------------------|
|                                                   |                                  |                                                  |                            |                                     |                                          |                          |
| G-4#7!\<_                                         | !                                |                                                  |                            |                                     | #!                                       | !                        |
| vs!C4&!^                                          |                                  |                                                  |                            |                                     | "!#\$###%!                               | !                        |
| %p-=4:9\$)!                                       |                                  |                                                  |                            |                                     |                                          |                          |
| vs!C4&!`                                          |                                  |                                                  |                            |                                     | #\$(2!+/03.!)                            | !                        |
| %p-=4:9\$)!                                       |                                  |                                                  |                            |                                     |                                          |                          |
| <b>Days 30 and 60</b>                             | !                                | (n/s vs HA)<br>(n/s vs spiro)                    | (n/s vs spiro)             | (n/s vs no-spiro)                   | !                                        | !                        |
| )!                                                |                                  |                                                  |                            |                                     |                                          |                          |
| G-4#\$!W                                          | !                                |                                                  |                            |                                     | (&(!+%## - .!)                           | /01!                     |
| G-4#\$!I                                          | !                                |                                                  |                            |                                     | #!                                       | /01!                     |
| G-4#7!\<_                                         | !                                |                                                  |                            |                                     | #!                                       | /01!                     |
| HA = a c; / = - ca ; /a = -a cab ; / = - ca       |                                  |                                                  |                            |                                     |                                          |                          |
|                                                   |                                  |                                                  |                            |                                     |                                          |                          |
| Ta 13. L                                          | a                                | a                                                | a                          | COVID-19.                           |                                          |                          |
| <b>Loss of ability of everyday activities (%)</b> | <b>Overall females (n = 270)</b> | <b>Non-HA females (n = 195)</b>                  | <b>HA females (n = 67)</b> | <b>Spironolactone Users (n = 8)</b> | <b>Non-spiro (non-HA + HA) (n = 262)</b> | <b>p-value (overall)</b> |
| <b>Day 0!</b>                                     | ±                                | ±                                                | ±                          | (n/s (p=0.098) vs no-spiro)         | , \$*!±                                  | ###!                     |
|                                                   | !                                | (p=0.004) vs HA<br>(n/s (p=0.15) vs spiro)       | vs spiro                   | (p=0.028)                           |                                          | !                        |
| <b>Day 3!</b>                                     | ±                                | ±                                                | ±                          | (p=0.48) vs no-spiro                | '\$(!±                                   | #\$'#!+/03.!)            |
|                                                   | !                                | (n/s (p=0.17) vs HA))<br>(n/s (p=0.57) vs spiro) | (n/s (p=0.30) vs spiro)    |                                     |                                          | !                        |
| vs!C4&!^                                          |                                  |                                                  |                            |                                     | #####%!                                  | !                        |
| %p-=4:9\$)                                        |                                  |                                                  |                            |                                     |                                          |                          |
| <b>Day 7!</b>                                     | ±                                | ±                                                | ±                          | (n/s (p=0.78) vs no-spiro)          | ±                                        | #\$2'!+/03.!)            |
|                                                   | !                                | (n/s (p=0.95) vs HA)<br>(n/s (p=0.82) vs spiro)  | (n/s (p=0.68) vs spiro)    |                                     |                                          | !                        |
| vs!C4&!^                                          |                                  |                                                  |                            |                                     | "!#\$###%!                               | !                        |
| %p-=4:9\$)!                                       |                                  |                                                  |                            |                                     |                                          |                          |
| vs!C4&!`                                          |                                  |                                                  |                            |                                     | ##\$*!+/03.!)                            | !                        |
| %p-=4:9\$)!                                       |                                  |                                                  |                            |                                     |                                          |                          |
| <b>Day 14!</b>                                    | ±                                |                                                  | ±                          |                                     | ±                                        | #\$, ,!+/03.!)           |
|                                                   | !                                | (n/s vs HA)<br>(n/s vs spiro)                    | (n/s vs spiro)             | (n/s vs no-spiro)                   |                                          | !                        |
| vs!C4&!^                                          |                                  |                                                  |                            |                                     | "!#\$###%!                               | !                        |
| %p-=4:9\$)!                                       |                                  |                                                  |                            |                                     |                                          |                          |
| vs!C4&!`                                          |                                  |                                                  |                            |                                     | #\$, *!+/03.!)                           | !                        |
| %p-=4:9\$)!                                       |                                  |                                                  |                            |                                     |                                          |                          |

|                                    |  |  |  |  |  |  |                           |  |
|------------------------------------|--|--|--|--|--|--|---------------------------|--|
| <div>%p=-4:9\$)!<br/>Day 30!</div> |  |  |  |  |  |  | <div>%%\$#!+ / 03.!</div> |  |
|                                    |  |  |  |  |  |  |                           |  |
|                                    |  |  |  |  |  |  |                           |  |
|                                    |  |  |  |  |  |  |                           |  |
|                                    |  |  |  |  |  |  |                           |  |
|                                    |  |  |  |  |  |  |                           |  |
|                                    |  |  |  |  |  |  |                           |  |
|                                    |  |  |  |  |  |  |                           |  |
|                                    |  |  |  |  |  |  |                           |  |
|                                    |  |  |  |  |  |  |                           |  |
|                                    |  |  |  |  |  |  |                           |  |
|                                    |  |  |  |  |  |  |                           |  |
|                                    |  |  |  |  |  |  |                           |  |
|                                    |  |  |  |  |  |  |                           |  |
|                                    |  |  |  |  |  |  |                           |  |
|                                    |  |  |  |  |  |  |                           |  |
|                                    |  |  |  |  |  |  |                           |  |
|                                    |  |  |  |  |  |  |                           |  |
|                                    |  |  |  |  |  |  |                           |  |
|                                    |  |  |  |  |  |  |                           |  |
|                                    |  |  |  |  |  |  |                           |  |
|                                    |  |  |  |  |  |  |                           |  |
|                                    |  |  |  |  |  |  |                           |  |
|                                    |  |  |  |  |  |  |                           |  |
|                                    |  |  |  |  |  |  |                           |  |
|                                    |  |  |  |  |  |  |                           |  |
|                                    |  |  |  |  |  |  |                           |  |
|                                    |  |  |  |  |  |  |                           |  |
|                                    |  |  |  |  |  |  |                           |  |
|                                    |  |  |  |  |  |  |                           |  |
|                                    |  |  |  |  |  |  |                           |  |
|                                    |  |  |  |  |  |  |                           |  |
|                                    |  |  |  |  |  |  |                           |  |
|                                    |  |  |  |  |  |  |                           |  |
|                                    |  |  |  |  |  |  |                           |  |
|                                    |  |  |  |  |  |  |                           |  |
|                                    |  |  |  |  |  |  |                           |  |
|                                    |  |  |  |  |  |  |                           |  |
|                                    |  |  |  |  |  |  |                           |  |
|                                    |  |  |  |  |  |  |                           |  |
|                                    |  |  |  |  |  |  |                           |  |
|                                    |  |  |  |  |  |  |                           |  |
|                                    |  |  |  |  |  |  |                           |  |
|                                    |  |  |  |  |  |  |                           |  |
|                                    |  |  |  |  |  |  |                           |  |
|                                    |  |  |  |  |  |  |                           |  |
|                                    |  |  |  |  |  |  |                           |  |
|                                    |  |  |  |  |  |  |                           |  |
|                                    |  |  |  |  |  |  |                           |  |
|                                    |  |  |  |  |  |  |                           |  |
|                                    |  |  |  |  |  |  |                           |  |
|                                    |  |  |  |  |  |  |                           |  |
|                                    |  |  |  |  |  |  |                           |  |
|                                    |  |  |  |  |  |  |                           |  |
|                                    |  |  |  |  |  |  |                           |  |
|                                    |  |  |  |  |  |  |                           |  |
|                                    |  |  |  |  |  |  |                           |  |
|                                    |  |  |  |  |  |  |                           |  |
|                                    |  |  |  |  |  |  |                           |  |
|                                    |  |  |  |  |  |  |                           |  |
|                                    |  |  |  |  |  |  |                           |  |
|                                    |  |  |  |  |  |  |                           |  |
|                                    |  |  |  |  |  |  |                           |  |
|                                    |  |  |  |  |  |  |                           |  |
|                                    |  |  |  |  |  |  |                           |  |
|                                    |  |  |  |  |  |  |                           |  |
|                                    |  |  |  |  |  |  |                           |  |
|                                    |  |  |  |  |  |  |                           |  |
|                                    |  |  |  |  |  |  |                           |  |
|                                    |  |  |  |  |  |  |                           |  |
|                                    |  |  |  |  |  |  |                           |  |
|                                    |  |  |  |  |  |  |                           |  |
|                                    |  |  |  |  |  |  |                           |  |
|                                    |  |  |  |  |  |  |                           |  |
|                                    |  |  |  |  |  |  |                           |  |
|                                    |  |  |  |  |  |  |                           |  |
|                                    |  |  |  |  |  |  |                           |  |
|                                    |  |  |  |  |  |  |                           |  |
|                                    |  |  |  |  |  |  |                           |  |
|                                    |  |  |  |  |  |  |                           |  |
|                                    |  |  |  |  |  |  |                           |  |
|                                    |  |  |  |  |  |  |                           |  |
|                                    |  |  |  |  |  |  |                           |  |
|                                    |  |  |  |  |  |  |                           |  |
|                                    |  |  |  |  |  |  |                           |  |
|                                    |  |  |  |  |  |  |                           |  |
|                                    |  |  |  |  |  |  |                           |  |
|                                    |  |  |  |  |  |  |                           |  |
|                                    |  |  |  |  |  |  |                           |  |
|                                    |  |  |  |  |  |  |                           |  |
|                                    |  |  |  |  |  |  |                           |  |
|                                    |  |  |  |  |  |  |                           |  |
|                                    |  |  |  |  |  |  |                           |  |
|                                    |  |  |  |  |  |  |                           |  |
|                                    |  |  |  |  |  |  |                           |  |
|                                    |  |  |  |  |  |  |                           |  |
|                                    |  |  |  |  |  |  |                           |  |
|                                    |  |  |  |  |  |  |                           |  |
|                                    |  |  |  |  |  |  |                           |  |
|                                    |  |  |  |  |  |  |                           |  |
|                                    |  |  |  |  |  |  |                           |  |
|                                    |  |  |  |  |  |  |                           |  |
|                                    |  |  |  |  |  |  |                           |  |
|                                    |  |  |  |  |  |  |                           |  |
|                                    |  |  |  |  |  |  |                           |  |
|                                    |  |  |  |  |  |  |                           |  |
|                                    |  |  |  |  |  |  |                           |  |
|                                    |  |  |  |  |  |  |                           |  |
|                                    |  |  |  |  |  |  |                           |  |
|                                    |  |  |  |  |  |  |                           |  |
|                                    |  |  |  |  |  |  |                           |  |
|                                    |  |  |  |  |  |  |                           |  |
|                                    |  |  |  |  |  |  |                           |  |
|                                    |  |  |  |  |  |  |                           |  |
|                                    |  |  |  |  |  |  |                           |  |
|                                    |  |  |  |  |  |  |                           |  |
|                                    |  |  |  |  |  |  |                           |  |
|                                    |  |  |  |  |  |  |                           |  |
|                                    |  |  |  |  |  |  |                           |  |
|                                    |  |  |  |  |  |  |                           |  |
|                                    |  |  |  |  |  |  |                           |  |
|                                    |  |  |  |  |  |  |                           |  |
|                                    |  |  |  |  |  |  |                           |  |
|                                    |  |  |  |  |  |  |                           |  |
|                                    |  |  |  |  |  |  |                           |  |
|                                    |  |  |  |  |  |  |                           |  |
|                                    |  |  |  |  |  |  |                           |  |
|                                    |  |  |  |  |  |  |                           |  |
|                                    |  |  |  |  |  |  |                           |  |
|                                    |  |  |  |  |  |  |                           |  |
|                                    |  |  |  |  |  |  |                           |  |
|                                    |  |  |  |  |  |  |                           |  |
|                                    |  |  |  |  |  |  |                           |  |
|                                    |  |  |  |  |  |  |                           |  |
|                                    |  |  |  |  |  |  |                           |  |
|                                    |  |  |  |  |  |  |                           |  |
|                                    |  |  |  |  |  |  |                           |  |
|                                    |  |  |  |  |  |  |                           |  |
|                                    |  |  |  |  |  |  |                           |  |
|                                    |  |  |  |  |  |  |                           |  |
|                                    |  |  |  |  |  |  |                           |  |
|                                    |  |  |  |  |  |  |                           |  |
|                                    |  |  |  |  |  |  |                           |  |
|                                    |  |  |  |  |  |  |                           |  |
|                                    |  |  |  |  |  |  |                           |  |
|                                    |  |  |  |  |  |  |                           |  |
|                                    |  |  |  |  |  |  |                           |  |
|                                    |  |  |  |  |  |  |                           |  |
|                                    |  |  |  |  |  |  |                           |  |
|                                    |  |  |  |  |  |  |                           |  |
|                                    |  |  |  |  |  |  |                           |  |
|                                    |  |  |  |  |  |  |                           |  |
|                                    |  |  |  |  |  |  |                           |  |
|                                    |  |  |  |  |  |  |                           |  |
|                                    |  |  |  |  |  |  |                           |  |
|                                    |  |  |  |  |  |  |                           |  |
|                                    |  |  |  |  |  |  |                           |  |
|                                    |  |  |  |  |  |  |                           |  |
|                                    |  |  |  |  |  |  |                           |  |
|                                    |  |  |  |  |  |  |                           |  |
|                                    |  |  |  |  |  |  |                           |  |
|                                    |  |  |  |  |  |  |                           |  |
|                                    |  |  |  |  |  |  |                           |  |
|                                    |  |  |  |  |  |  |                           |  |
|                                    |  |  |  |  |  |  |                           |  |
|                                    |  |  |  |  |  |  |                           |  |
|                                    |  |  |  |  |  |  |                           |  |
|                                    |  |  |  |  |  |  |                           |  |
|                                    |  |  |  |  |  |  |                           |  |
|                                    |  |  |  |  |  |  |                           |  |
|                                    |  |  |  |  |  |  |                           |  |
|                                    |  |  |  |  |  |  |                           |  |
|                                    |  |  |  |  |  |  |                           |  |
|                                    |  |  |  |  |  |  |                           |  |
|                                    |  |  |  |  |  |  |                           |  |
|                                    |  |  |  |  |  |  |                           |  |
|                                    |  |  |  |  |  |  |                           |  |
|                                    |  |  |  |  |  |  |                           |  |
|                                    |  |  |  |  |  |  |                           |  |
|                                    |  |  |  |  |  |  |                           |  |
|                                    |  |  |  |  |  |  |                           |  |
|                                    |  |  |  |  |  |  |                           |  |
|                                    |  |  |  |  |  |  |                           |  |
|                                    |  |  |  |  |  |  |                           |  |
|                                    |  |  |  |  |  |  |                           |  |
|                                    |  |  |  |  |  |  |                           |  |
|                                    |  |  |  |  |  |  |                           |  |
|                                    |  |  |  |  |  |  |                           |  |
|                                    |  |  |  |  |  |  |                           |  |
|                                    |  |  |  |  |  |  |                           |  |
|                                    |  |  |  |  |  |  |                           |  |
|                                    |  |  |  |  |  |  |                           |  |
|                                    |  |  |  |  |  |  |                           |  |
|                                    |  |  |  |  |  |  |                           |  |
|                                    |  |  |  |  |  |  |                           |  |
|                                    |  |  |  |  |  |  |                           |  |
|                                    |  |  |  |  |  |  |                           |  |
|                                    |  |  |  |  |  |  |                           |  |
|                                    |  |  |  |  |  |  |                           |  |
|                                    |  |  |  |  |  |  |                           |  |
|                                    |  |  |  |  |  |  |                           |  |
|                                    |  |  |  |  |  |  |                           |  |
|                                    |  |  |  |  |  |  |                           |  |
|                                    |  |  |  |  |  |  |                           |  |
|                                    |  |  |  |  |  |  |                           |  |
|                                    |  |  |  |  |  |  |                           |  |
|                                    |  |  |  |  |  |  |                           |  |
|                                    |  |  |  |  |  |  |                           |  |
|                                    |  |  |  |  |  |  |                           |  |
|                                    |  |  |  |  |  |  |                           |  |
|                                    |  |  |  |  |  |  |                           |  |
|                                    |  |  |  |  |  |  |                           |  |
|                                    |  |  |  |  |  |  |                           |  |
|                                    |  |  |  |  |  |  |                           |  |
|                                    |  |  |  |  |  |  |                           |  |
|                                    |  |  |  |  |  |  |                           |  |
|                                    |  |  |  |  |  |  |                           |  |
|                                    |  |  |  |  |  |  |                           |  |
|                                    |  |  |  |  |  |  |                           |  |
|                                    |  |  |  |  |  |  |                           |  |
|                                    |  |  |  |  |  |  |                           |  |
|                                    |  |  |  |  |  |  |                           |  |
|                                    |  |  |  |  |  |  |                           |  |
|                                    |  |  |  |  |  |  |                           |  |
|                                    |  |  |  |  |  |  |                           |  |
|                                    |  |  |  |  |  |  |                           |  |
|                                    |  |  |  |  |  |  |                           |  |
|                                    |  |  |  |  |  |  |                           |  |
|                                    |  |  |  |  |  |  |                           |  |
|                                    |  |  |  |  |  |  |                           |  |
|                                    |  |  |  |  |  |  |                           |  |
|                                    |  |  |  |  |  |  |                           |  |
|                                    |  |  |  |  |  |  |                           |  |
|                                    |  |  |  |  |  |  |                           |  |
|                                    |  |  |  |  |  |  |                           |  |
|                                    |  |  |  |  |  |  |                           |  |
|                                    |  |  |  |  |  |  |                           |  |
|                                    |  |  |  |  |  |  |                           |  |
|                                    |  |  |  |  |  |  |                           |  |
|                                    |  |  |  |  |  |  |                           |  |
|                                    |  |  |  |  |  |  |                           |  |
|                                    |  |  |  |  |  |  |                           |  |
|                                    |  |  |  |  |  |  |                           |  |
|                                    |  |  |  |  |  |  |                           |  |
|                                    |  |  |  |  |  |  |                           |  |
|                                    |  |  |  |  |  |  |                           |  |
|                                    |  |  |  |  |  |  |                           |  |
|                                    |  |  |  |  |  |  |                           |  |
|                                    |  |  |  |  |  |  |                           |  |
|                                    |  |  |  |  |  |  |                           |  |
|                                    |  |  |  |  |  |  |                           |  |
|                                    |  |  |  |  |  |  |                           |  |
|                                    |  |  |  |  |  |  |                           |  |
|                                    |  |  |  |  |  |  |                           |  |
|                                    |  |  |  |  |  |  |                           |  |
|                                    |  |  |  |  |  |  |                           |  |
|                                    |  |  |  |  |  |  |                           |  |
|                                    |  |  |  |  |  |  |                           |  |
|                                    |  |  |  |  |  |  |                           |  |
|                                    |  |  |  |  |  |  |                           |  |
|                                    |  |  |  |  |  |  |                           |  |
|                                    |  |  |  |  |  |  |                           |  |
|                                    |  |  |  |  |  |  |                           |  |
|                                    |  |  |  |  |  |  |                           |  |
|                                    |  |  |  |  |  |  |                           |  |
|                                    |  |  |  |  |  |  |                           |  |
|                                    |  |  |  |  |  |  |                           |  |
|                                    |  |  |  |  |  |  |                           |  |
|                                    |  |  |  |  |  |  |                           |  |
|                                    |  |  |  |  |  |  |                           |  |

|                                 |   |   |
|---------------------------------|---|---|
| vs!C4&!^<br>%p=-4:9\$)!         | ! | ! |
| vs!C4&!`<br>%p=-4:9\$)!         | ! | ! |
| vs!C4&!WY<br>%p=-4:9\$)         | ! | ! |
| HA = a c; / = - ca ; CI = c c a |   |   |

| Disease progression outcomes                      | Overall females (n = 270) | Non-HA females (n = 195) | HA females (n = 67) | Spironolactone Users (n = 8) | p-value (overall) |
|---------------------------------------------------|---------------------------|--------------------------|---------------------|------------------------------|-------------------|
| Brescia COVID-19 Respiratory Severity Scale (0-4) | 0 !                       | 0                        | 0                   | 0                            | %###!+/03..!      |
| Hospitalization                                   | 0!                        | 0                        | 0                   | 0                            | %###!+/03..!      |
| Mechanical ventilation                            | 0!                        | 0                        | 0                   | 0                            | %###!+/03..!      |
| Noradrenaline/dopamine                            | 0!                        | 0                        | 0                   | 0                            | %###!+/03..!      |
| Death                                             | 0!                        | 0                        | 0                   | 0                            | %###!+/03..!      |

### *The importance of an early diagnosis of COVID-19*

T a a a a a

a COVID-19. O a a

COVID-19 a , COVID-19

a , a a a . A

a a a , a a

a COVID-19. T a a a a  
a a a .  
R a a a a a a ,  
a a a a a ( a a  
) . C a , a a , a a a  
a . E a a , a a a a a  
a a , a a a . M ,  
a a a a a a a .  
M a a - a a a a  
, a a a a a  
a , a a a a a a  
a .  
T a a a COVID-19 a  
a a a COVID-19 a a  
. W a a COVID-19 a a

# *The patient with COVID-19: characteri ation of the patients and the disease*

Ba a a a -HA a HA  
a a HA a a BMI. T  
a a a a a  
HA a . F , a HA (  
a a a , a a a ) a a a , a a  
a a .  
D BMI HA a -HA a a a  
a , a a a . C ,  
a , HA a a a  
COVID-19 a -HA

W a a a  
 , a a a HA a -HA a ,  
 a PCOS a a

HA.

I a a a a a , a  
 a (23-26). A a a  
 a a a a 80% a . T a a-a a  
 a , - , URTI- , a GI - a a  
 a , a , a  
 . T a a URTI- a a HA a a  
 a a a a a .

T a a a , a a a  
 a a a a a COVID-19 a  
 a a a a a  
 a . A , a a a a a a  
 a a a a a SARS-C V-2, a  
 a a - a , a a , a  
*versus* .

C , a a a a a  
 a a a a , a a a .  
 T a a a , a Xa a a a a , a  
 a a , COVID-19 a  
 - a *per se*. V a D, a a , a a C,  
 a a a . H , a a  
 a .

### COVID-19 outcomes

A a COVID-19 a , a PCR-  
 SAR-C V-2 a a a a a  
 HA- a -HA, HA, a a - . H , - -



a a a HA- a .H , a  
a a COVID-19 a a  
a , a COVID-19 a a HA-  
a a -a a a .  
  
U HA- , - - a a a a  
-HA a HA a , a a a , a HA a  
-HA, a a a a a HA a a a  
a .  
  
A a a a a a  
, HA- a , a  
- -a a a a a -HA a . T a a  
a a a a a a .  
I a a , a a a, a a a ,  
a a a a HA a a a ,  
a a a a a a AGA (5,6,14,16,17), a  
TMPRSS-2.  
  
D a Da 0 a 7 HA  
a , a a  
, a a (Ta 11 13),  
a a HA a , a .  
D HA, a a a  
a a a a .  
  
T a a a a a  
a a a a a a 14 a , a  
a a a - a a . A  
HA a a -HA a HA- a ,  
a a , a a a a .  
  
U a a , a a  
30 a a a a .H , a a a a a

a CT a a  
a a .H , a a a a  
a .

C a a COVID-19 , WHO COVID S a a  
B a R a S a , a a a a ,  
a a a , a a , a  
I a , a .

O - a HA a , HA a a a  
a a a COVID-19. A a , a  
a COVID-19 a a a  
 , a a a a . S a a  
a COVID-19, a  
a - -a a a 2 (ACE2) a , a  
a (AT) 2- -AT1 a , a TMPRSS2 a , a a  
a a a a - a a a (20-22), a  
a a .

### *Post-COVID syndrome?*

T a a a COVID-19  
a a a , a a a , a a , a  
- , - , a -COVID , a a  
a a 20 30% a , a , a ,  
a , a , a a a , a a ,  
a (CFS), a a a  
a a (27,28). H , a a a a  
 , a a , a a a  
a a a a .

*The effect of specific treatments on COVID-19: comparison with existing literature*

W a a a , a a , a a  
a a a a , a  
a , a a a (10-12). A a a  
a , a  
a - a , a a . H , a RCT a  
a a a a a  
 , a COVID-19 a .

### *Limitations*

A a a a - a -  
RCT, a a a a  
a a , a a a a a a a  
 , a a , , . A , a  
a a a a . H , a  
a - a COVID-19  
a , a RCT a a a -  
.

T a a a - a a  
a a a COVID-19 a  
a a a a a a , : 1. La a a  
a a a a COVID-19 a a ; 2.  
S - a COVID-19; 3. I a a -  
COVID-19, ; a 4. C a  
a , a a COVID-19  
a . A a a a a , a  
a a a , a .

### *Final discussion*

S COVID-19 a , , a a a , a  
a a a a a a a  
a a a a , a a ,  
a .  
T a a a a a a a ,  
, a a a a  
COVID-19, a a .  
A a , HA a a a COVID-19 ,  
a a a a a  
a -HA a a . T a a  
a 100 HA a a , a  
-HA. T a a a  
a AGA a a a , .

## Conclusion

A , a COVID-19 a a a a a  
a a a a a , a a  
, a a a a  
a a a a a  
a a a a COVID-19 ,  
a a a a .  
W a - a ( -HA), HA a a a a  
a a , COVID-19 a  
a a a a . S a a a  
a a HA.

F a

T a C a I  
(B a a, DF, B a ) a A B I (I , CA, USA).

C a  
A a a a a

## References

1. G a W, N Z, H Y, a . C a a a a a 2019  
C a. *N Engl J Med* 2020; F 28.
2. Ha a a a K, K a S, N C, a . O a a  
COVID-19: A a Ea Da a F N Y C [ a a , 2020 Ma 29]. *Obesity (Silver Spring)*. 2020;10.1002/ .22923.
3. Ka M, S a F, M a EK, a . A a O D a  
S a Pa COVID-19 [ a a , 2020 A 30]. *Obesity (Silver Spring)*. 2020;10.1002/ .22859.
4. Pa a L, K DG, L W, a . S , a a a  
a a a a - a , a  
- a a , a a COVID-19 B ,  
N Y [ a a , 2020 Ma 16]. *Metabolism*. 2020;108:154262.
5. Ca a a AB, Za FG, R a RG, A LCP, V a VC, A A,  
Da a LP, Ma a A, Ka a -D a L, L a T, J a DLM,  
Ba E S a PGM, T a a L, A -S a EO, La a a LN, S a AT,  
E LS, P a AJ, F a FGR, G a a OCE, Da a VCS, F a  
RHM, M a EP, G NA, Ca FF, Ma a IS, H a F CR, K a  
APM, A a a RB, B O a MF, S a-N A, Fa a a M, L

- RD, Ma a FR, B a O; C a C -19 B a I I a .  
H A M - -M a C -  
19. N E J M . 2020 J 23:NEJM a2019014. :  
10.1056/NEJM a2019014.
6. Z F, Y T, D R, a . C a a a a a  
a COVID-19 W a , C a: a [   
a a , 2020 Ma 11] [ a a La . 2020 Ma  
12;:]. *Lancet*. 2020;S0140-6736(20)30566-3.
7. La SA, G a KH, B Q, a . T I a P C a D a  
2019 (COVID-19) F P R C Ca : E a a  
A a [ a a , 2020 Ma 10]. *Ann Intern Med*.  
2020;10.7326/M20-0504.
8. W C, C X, Ca Y, a . R Fa A a W A R a  
D S a D a Pa W C a D a 2019 P a  
W a , C a [ a a , 2020 Ma 13]. *JAMA Intern Med*.  
2020;10.1001/ a a .2020.0994.
9. W C, C X, Ca Y, a . R Fa A a W A R a  
D S a D a Pa W C a D a 2019 P a  
W a , C a [ a a , 2020 Ma 13]. *JAMA Intern Med*.  
2020;10.1001/ a a .2020.0994.
10. :// . . / a / a - a - a - a - / -19/ a a-  
a (La a S 29 , 2020)
11. :// . . / a /2019- / / a - a -  
a a - a . (La a S 29 , 2020)
12. S EK, Za a LD, A KN, a . C a D a 2019 Ca  
S a -U S a , Ja a 22-Ma 30, 2020. *MMWR M M a W R*  
2020; 69:759.
13. Ca a , F.A. R COVID-19: a  
. *BMC Endocr Disord* **20**, 149 (2020). :// . /10.1186/ 12902-020-  
00626-0
14. Pa a a G, S a A, P C, B F, D B R, C a F, S a a a S,  
A FE. COVID-19 a a a a : a . J I M .  
2020 A ;288(2):192-206. : 10.1111/ .13091.

15. G A, Va -Ga a S, Wa CG, a . A a a : a a a a COVID-19 a S a - A a a COVID-19 [ a a , 2020 A 16]. *J Cosmet Dermatol*. 2020;10.1111/ .13443.
16. G A, M C J, Wa CG, a . W a a a a COVID-19? A a a a [ a a , 2020 A 1]. *Dermatol Ther*. 2020; 13365.
17. M C J, Wa CG, H a S, Va -Ga S, G a F, C B, R R, S a -V a S, I a RM, Ta MA, Ca a FA, M a NA, S a J, S a R, G A. A R G Va a P COVID-19 D a S : A P L a S H a COVID-19 Ma Pa . J E A a D a V . 2020 S 25.
18. K a K, A MP, G TA, a . A a a C a D a 2019 (C -19) - a Da a , - a . C I D 2020.
19. G A, Wa CG, H a S, M C J, Va -Ga S, G a F, C B, R R, S a -V a S, Ra PM, Ca a FA, K a M, T A, S a J, S a R. A -a a a COVID-19 : a 77 a . J E A a D a V . 2020 S 25. : 10.1111/ .16953.
20. Ca a FA. Ca a COVID-19- a a ? A J P E M a . 2020 Ma 1;318(5):E587-E588. : 10.1152/a .00136.2020.
21. Ca a FA, Wa CG, G A. S a : A A -a a A - D T a Ma P P A a N C a (SARS-C V-2) I A R a D S (ARDS) COVID-19. F M (La a ). 2020 J 28;7:453. : 10.3389/ .2020.00453.
22. Ca a FA, G A, Wa CG. S a a SARS-C V-2: Ta a , a 2 (ACE2), a -a -a (RAAS). M H . 2020 J 16;143:110112. : 10.1016/ . .2020.110112.
23. :// . a . / / a - a -2019- -19- a - a ? R =126981& = (La a S 29 , 2020)
